# Supplementary material for: Functional panchromatic BODIPY dyes with near-infrared absorption: design, synthesis, characterization and use in dye-sensitized solar cells
Source: publisher site journal article supplement (doi:10.3762/bjoc.15.169), 2019-07-24
Supplement: Additional file 1 [file 1860-5397-15-169-S1.pdf]

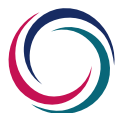

## Supporting Information

for

### **Functional panchromatic BODIPY dyes with near-infrared absorption: design, synthesis, characterization and use in dye-sensitized solar cells**

Quentin Huauilmé, Cyril Aumaitre, Outi Vilhelmiina Kontkanen, David Beljonne, Alexandra Sutter, Gilles Ulrich, Renaud Demadrille and Nicolas Leclerc

*Beilstein J. Org. Chem.* **2019**, *15*, 1758–1768. doi:10.3762/bjoc.15.169

## **Experimental part and copies of NMR spectra**

|                                 |        |
|---------------------------------|--------|
| Instrumentation                 | p. S2  |
| Synthetic procedures            | p.S4   |
| NMR spectra                     | p. S11 |
| HRMS spectra                    | p. S32 |
| Cyclic voltammetry measurements | p. S34 |
| Devices electrical parameters   | p. S35 |
| References                      | p. S35 |

## Instrumentation

### NMR spectroscopy

$^1\text{H}$  NMR,  $^{13}\text{C}$  NMR,  $^{11}\text{B}$  NMR and  $^{19}\text{F}$  NMR spectra were recorded on a Bruker Avance 400 MHz spectrometer at 298 K if not specified otherwise.  $^1\text{H}$  and  $^{13}\text{C}$  chemical shifts are reported to the relative difference in ppm with respect to the residual deuterated solvent peak: acetone- $d_6$  ( $\delta(^1\text{H})$  = 2.06 ppm,  $\delta(^{13}\text{C})$  = 206.7 ppm), chloroform- $d$  ( $\delta(^1\text{H})$  = 7.26 ppm,  $\delta(^{13}\text{C})$  = 77.16 ppm), tetrachloroethane- $d_2$  ( $\delta(^1\text{H})$  = 6.00 ppm,  $\delta(^{13}\text{C})$  = 73.78 ppm).

### Absorption and emission spectroscopies

UV-visible absorption spectra were recorded with a Shimadzu UV-3600 dual-beam grating spectrophotometer using a 1.0 cm quartz cell. The steady-state fluorescence emission and excitation spectra were recorded with a Horiba Jobin Yvon Fluoromax 4P spectrofluorimeter.

### Electrochemistry measurements

Oxidation and reduction potentials were determined by cyclic voltammetry with a conventional 3-electrode system using a voltammetric analyzer equipped with a platinum micro disk (2 mm<sup>2</sup>) working electrode and a platinum wire counter electrode. The reference electrode is constituted of a non-aqueous silver electrode including the following electrolyte solution: 0.01 M silver nitrate + 0.1 M tetrabutylammonium perchlorate in acetonitrile. Potentials were calibrated versus the saturated calomel electrode (SCE), using the ferrocene/ferrocinium ( $\text{Fc}/\text{Fc}^+$ ) couple as an internal reference and a conventional scan rate of 150 mV/s. Recrystallized tetrabutylammonium hexafluorophosphate ( $\text{Bu}_4\text{NPF}_6$ ) was used as the supporting electrolyte (0.1 M) in distilled and anhydrous DCM. All potentials are referred to the SCE electrode that was calibrated at 0.38 V vs the  $\text{Fc}/\text{Fc}^+$  system. Following the work of Jenekhe et al.,<sup>[1]</sup> we estimated the electron affinity (EA) or lowest unoccupied molecular orbital (LUMO) and the ionization potential (IP) or highest occupied molecular orbital (HOMO) from the redox data. The LUMO and HOMO levels were calculated from the following equations, using the oxidation and reduction onset potentials: LUMO (eV) =  $-[E_{\text{onset red}} (\text{vs SCE}) + 4.4]$  and HOMO (eV) =  $-[E_{\text{onset ox}} (\text{vs SCE}) + 4.4]$ , based on an SCE energy level of 4.4 eV relative to the vacuum.

### DSSC devices elaboration

12  $\mu\text{m}$  thick opaque anatase  $\text{TiO}_2$  electrodes are washed with absolute ethanol and dried with argon.  $\text{TiCl}_4$  (0.45 mL, 778 mg, 4.10 mmol) is added dropwise to water (100 mL) at 4 °C. The solution is further stirred 5 minutes in an ice-cooled water. The titanium electrodes are placed in the above-mentioned solution at 70 °C for 20 min. At room temperature, the treated electrodes are rinsed with water, absolute ethanol, and are then dried with an argon flux. They are then calcinated under air at 500 °C for 20 min. Once cooled down to room temperature, the electrodes are immersed in the dyeing bath overnight ( $[\text{Dye}]$  = 0.50 M,  $[\text{CDCA}]$  = 5.0 M in a mixture of

chloroform and *tert*-butanol (1:1, v/v)). After 16 hours of impregnation, the photoelectrodes are successively rinsed with absolute EtOH and chloroform, and then dried under an argon flux. The counter electrodes are washed with ethanol and dried under argon flux. They are coated with a platisol solution (Solaronix, Switzerland), and then charred at 500°C under air for 20 minutes. The photoanode and the counterelectrode are sealed using a thermosealing polymer (60 thick, Solaronix, Switzerland). The resulting device is filled with the appropriate electrolyte. Note that the devices are realized **one by one** (so that the exposure to the air is reduced).

## Synthetic procedures

### Compound 1

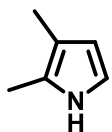

To a solution of 2-butanone (15.0 g, 208 mmol, 1.00 equiv) and hydroxylamine hydrochloride (28.9 g, 416 mmol, 2.00 equiv) in DMSO (100 mL) is carefully and portionwise added  $\text{NaHCO}_3$  (31.4 g, 374 mmol, 1.80 equiv). The mixture is stirred at 60 °C overnight (18 h). At rt, the reaction mixture is portioned between brine (100 mL) and  $\text{Et}_2\text{O}$  (100 mL). The aqueous layer is extracted twice with  $\text{Et}_2\text{O}$  ( $2 \times 50$  mL). The organic layer is concentrated under vacuum. The hydroxylamine intermediate is solubilized in anhydrous DMSO (100 mL). The mixture is degassed by gentle bubbling of acetylene at R.T. for 15 minutes. KOH (17.5 g, 312 mmol, 1.50 equiv) is added and the reaction mixture is stirred at 110 °C for 5 h, with continuous gentle bubbling of acetylene (ca.  $15 \text{ cm}^3 \cdot \text{min}^{-1}$ ). At rt, the reaction mixture is portioned between water (150 mL) and  $\text{Et}_2\text{O}$  (100 mL). The aqueous layer is extracted twice with  $\text{Et}_2\text{O}$  ( $2 \times 50$  mL). The combined organic layer is dried over  $\text{MgSO}_4$ , filtered off and concentrated under vacuum. The resulting black residue is purified by column chromatography ( $\text{Al}_2\text{O}_3$ , PE/ $\text{Et}_2\text{O}$  3:1) to afford pure compound 1 as a colorless oil that darkens slowly at rt (4.88 g, 51.3 mmol, 24% over two steps). Analytical data were found to be in accordance with the relevant literature. <sup>2</sup> **<sup>1</sup>H-NMR (Acetone-*d*<sub>6</sub>, 298 K, 400 MHz)  $\delta$  (ppm):** 9.37 (bs, 1H), 6.47 (d,  $J = 2.6$  Hz, 1H), 5.79 (d,  $J = 2.6$  Hz, 1H), 2.10 (s, 3H), 1.94 (s, 3H). **<sup>13</sup>C-NMR (Acetone-*d*<sub>6</sub>, 298 K, 100 MHz)  $\delta$  (ppm):** 124.0, 115.7, 114.1, 110.4, 11.5, 11.2.

### Compound 2

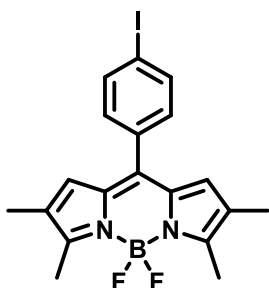

A solution of 2,3-dimethylpyrrole (2.00 g, 21.0 mmol, 2.50 equiv) in anhydrous DCM (200 mL) is degassed with Argon for 10 minutes. 4-Iodobenzoyl chloride (2.24 g, 8.41 g, 1.00 equiv) is added in one go and the mixture is stirred at RT for 5 days. Anhydrous  $\text{NEt}_3$  (6.81 g, 67.3 mmol, 8.00 equiv) and  $\text{BF}_3 \cdot \text{OEt}_2$  (7.15 g, 50.4 mmol, 6.00 equiv) are carefully added at 0 °C. The reaction mixture is allowed to warm up to rt and is stirred at this temperature for 2 additional hours. The mixture is poured on saturated  $\text{NaHCO}_3$  aqueous solution (100 mL). The aqueous layer is extracted with DCM ( $2 \times 50$  mL). The combined organic layer is dried over  $\text{MgSO}_4$ , filtered off and concentrated to dryness. The resulting black residue is filtered through a pad of silica (DCM/PE 1/1). The dark red fraction is collected and concentrated to dryness. Final purification is achieved by column chromatography (PE/DCM 7/3) to afford the pure expected compound as a red solid (1.32 g, 2.94 mmol, 35%). **<sup>1</sup>H-NMR ( $\text{CDCl}_3$ , 298 K, 400 MHz)  $\delta$  (ppm):** 7.81 (d,  $^3J = 8.4$  Hz, 2H), 7.20 (d,  $J = 8.4$  Hz, 2H), 6.42 (bs, 2H), 2.54 (s, 6H), 1.99 (d,  $^4J = 0.77$  Hz, 6H). **<sup>13</sup>C-NMR ( $\text{CDCl}_3$ , 298 K, 100 MHz)  $\delta$  (ppm):** 156.3, 138.7, 137.5, 134.1, 132.6, 132.0, 128.3, 12.8, 11.2.

### Compound 3

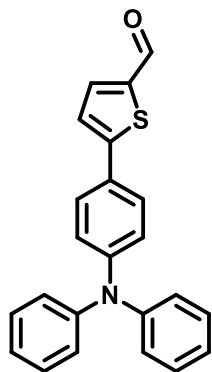

A solution of 5-bromothiophene-2-carbaldehyde (702 mg, 3.67 mmol, 1.00 equiv) and (4-(diphenylamino)phenyl)boronic acid (1.16 g, 4.04 mmol, 1.10 equiv) in a mixture of aqueous 1 M  $\text{K}_2\text{CO}_3$  (7.4 mL, 2.0 equiv) and toluene (50 mL) is degassed with Argon. The reaction mixture is stirred at 100 °C overnight (18 h). At rt, the mixture is portioned between water (40 mL) and  $\text{Et}_2\text{O}$  (40 mL). The aqueous layer is extracted twice with  $\text{Et}_2\text{O}$  ( $2 \times 50$  mL). The combined organic layer is washed with brine, dried over  $\text{MgSO}_4$ , filtered off and concentrated to dryness. The organic layer is concentrated under vacuum. The resulting residue is purified by column chromatography (PE/DCM) to afford the expected compound **3** as a colorless oil (1.04 g, 2.93 mmol, 80%).

Analytical data were found to be in accordance with the relevant literature. <sup>[3]</sup>  **$^1\text{H-NMR}$  ( $\text{CDCl}_3$ , 298 K, 400 MHz)  $\delta$  (ppm):** 9.85 (s, 1H), 7.71 (d,  $J = 4.0$  Hz, 1H), 7.52 (d,  $J = 8.0$  Hz, 2H), 7.28-7.32 (m, 5H), 7.05-7.15 (m, 8H).  **$^{13}\text{C-NMR}$  ( $\text{CDCl}_3$ , 298 K, 100 MHz)  $\delta$  (ppm):** 182.7, 154.7, 149.3, 147.1, 141.5, 137.9, 129.6, 127.4, 126.3, 125.3, 124.0, 123.0, 122.5.

### Compound 4

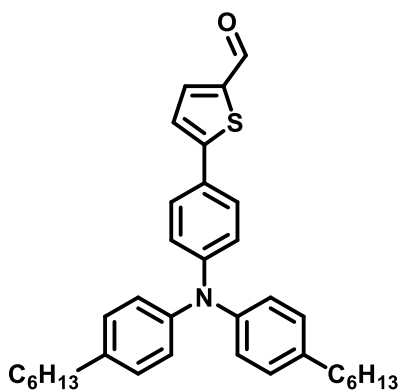

To a solution of 4-bromo-*N,N*-bis(4-hexylphenyl)aniline (1.50 g, 3.04 mmol, 1.00 equiv) in anhydrous THF (15 mL) is added dropwise at -78 °C *n*-BuLi (2.5 M in hexanes, 1.3 mL, 3.3 mmol, 1.1 equiv). The reaction mixture is stirred at -78 °C for 30 minutes before trimethyltin chloride (1.0 M in  $\text{Et}_2\text{O}$ , 3.4 mL, 3.4 mmol, 1.1 equiv) is added in one portion. The mixture is allowed to warm up to rt overnight (18 h). Water (50 mL) and  $\text{Et}_2\text{O}$  (70 mL) are successively added. The aqueous layer is extracted once with  $\text{Et}_2\text{O}$  (50 mL). The combined organic layer is washed with brine, dried over  $\text{MgSO}_4$ , filtered off and concentrated to dryness. The organic layer is concentrated under vacuum. The resulting yellow oil is used without any further purification.

A solution of 5-bromothiophene-2-carbaldehyde (401 mg, 2.10 mmol, 1.00 equiv) and the previous organotin intermediate in anhydrous toluene (60 mL) is degassed for 20 minutes with argon.  $\text{Pd}_2(\text{dba})_3$  (57 mg, 0.063 mmol, 3 mol %) and  $\text{P}(o\text{-tolyl})_3$  (76 mg, 0.25 mmol, 12 mol %) are successively added and the reaction mixture is stirred at 110 °C overnight (18 h). At rt, the reaction mixture is concentrated under vacuum (extra precaution should be taken to avoid any contamination with  $\text{BrSnMe}_3$ ). The residue is purified by column chromatography (PE/ $\text{EtOAc}$  4:1) to afford pure compound **4** as a pale yellow solid (527 mg, 1.01 mmol, 48 %).  **$^1\text{H-NMR}$  ( $\text{CDCl}_3$ , 298 K, 400 MHz)  $\delta$  (ppm):** 9.84 (s, 1H), 7.69 (d,  $^3J = 4.0$  Hz, 1H), 7.48 (d,  $^3J = 8.9$  Hz, 2H), 7.27 (d, 4.0 Hz, 1H), 6.99-7.11 (m, 10H), 2.58 (t,  $J = 8.0$  Hz, 4H), 1.58-1.65 (m, 4H), 1.31-1.34 (m, 12H), 0.90 (m, 6H).  **$^{13}\text{C-NMR}$  ( $\text{CDCl}_3$ , 298 K, 100 MHz)  $\delta$  (ppm):** 182.7, 155.1, 149.7, 144.6, 141.2, 139.0, 138.0, 129.5, 127.8, 125.5, 152.3, 122.7, 121.3, 35.6, 31.9, 31.6, 29.2, 22.8, 14.2.

## Compound 5

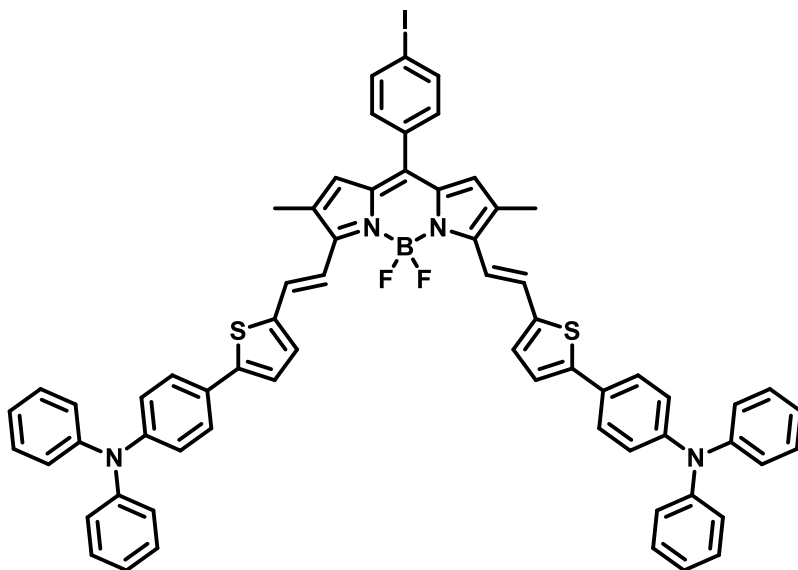

To a solution of compound **2** (120 mg, 0.266 mmol, 1.0 equiv) and compound **3** (236 mg, 0.665 mmol, 2.50 equiv) in toluene (5 mL) and piperidine (1 mL) is added a catalytic amount of PTSA (<2 mg). The mixture is heated under reflux for 20 minutes. The solvents are removed under vacuum. The residue is purified by column chromatography (cyclohexane /toluene/DCM 5:3:2) to afford pure compound **5** as a black solid (104 mg, 0.0924 mmol, 35 %).

**<sup>1</sup>H-NMR (CDCl<sub>3</sub>, 298 K, 400 MHz) δ (ppm):** 7.83 (d, <sup>3</sup>J = 8.3 Hz, 2H), 7.58 (d, <sup>3</sup>J = 16.3 Hz, 2H), 7.52 (d, <sup>3</sup>J = 8.7 Hz, 4H), 7.44 (d, <sup>3</sup>J = 16.3 Hz, 2H), 7.03-7.29 (m, 30H), 6.48 (s, 2H), 2.32 (s, 6H).  
**<sup>13</sup>C-NMR (CDCl<sub>3</sub>, 298 K, 100 MHz) δ (ppm):** 151.4, 147.7, 147.3, 146.1, 141.6, 137.4, 134.9, 134.4, 132.1, 130.3, 129.6, 129.4, 128.8, 127.9, 126.7, 124.7, 123.4, 123.3, 118.7, 95.6, 14.9.

## Compound 6

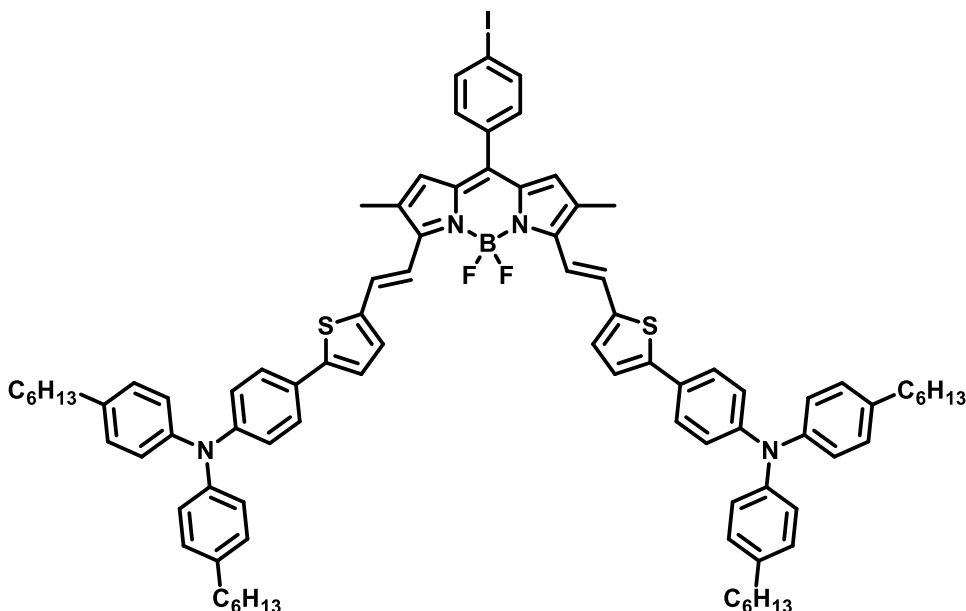

To a solution of compound **2** (120 mg, 0.266 mmol, 1.00 equiv) and compound **4** (325 mg, 0.622 mmol, 2.50 equiv) in toluene (5 mL) and piperidine (1 mL) is added a catalytic amount of PTSA (<2 mg). The mixture is heated at reflux for 20 minutes.

The solvent are removed under vacuum. The residue is purified by column chromatography (PE/DCM 3:2). Final purification is achieved by recrystallization from DCM/EtOH to afford pure compound **5** as a black solid (120 mg, 0.0821 mmol, 30 %). **<sup>1</sup>H-NMR (CDCl<sub>3</sub>, 298 K, 400 MHz) δ (ppm):** 7.82 (d, <sup>3</sup>J = 8.1 Hz, 2H), 7.57 (d, <sup>3</sup>J = 16.1 Hz, 2H), 7.48 (d, <sup>3</sup>J = 7.5 Hz, 4H), 7.44 (d, <sup>3</sup>J = 16.1 Hz, 2H), 7.18-7.27 (m, 6H), 7.01-7.09 (m, 20H), 6.47 (s, 2H), 2.57 (t, <sup>3</sup>J = 8.0 Hz, 8H), 2.32 (s, 6H), 1.57-1.65 (m, 8H), 1.21-1.41 (m, 24H), 0.88-0.91 (m, 12H). **<sup>13</sup>C-NMR (CDCl<sub>3</sub>, 298 K, 100 MHz) δ (ppm):** 148.3, 146.6, 145.1, 141.4, 138.3, 137.6, 135.0, 134.5, 132.2, 130.4, 129.9, 126.6, 125.0, 123.2, 122.3, 95.7, 35.6, 31.9, 31.6, 29.2, 22.8, 15.0, 14.3.

## Compound 7

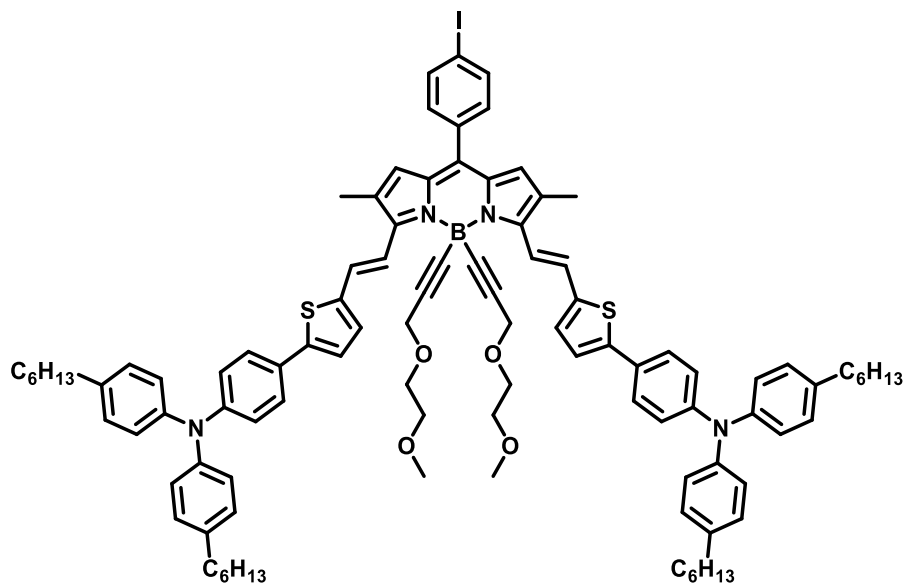

To a solution of 3-(2-methoxyethoxy)prop-1-yne (84 mg, 0.74 mmol, 3.0 equiv) in anhydrous THF (5.0 mL) is added at rt EtMgBr (1.0 M in THF, 0.66 mmol, 2.7 equiv). The mixture is stirred at 60 °C for 2 hours. At rt, the resulting Grignard intermediate is transferred via cannula on a solution of compound 5 (360 mg, 0.246 mmol,

1.00 equiv) in anhydrous THF (10 mL). The reaction mixture is stirred at 60 °C overnight (20 h). At rt, the reaction mixture is portioned between saturated NaHCO<sub>3</sub> aqueous solution (50 mL) and Et<sub>2</sub>O (100 mL). The aqueous layer is extracted twice with Et<sub>2</sub>O (2 × 50 mL). At rt, the combined organic layer is dried over MgSO<sub>4</sub>, filtered off and concentrated to dryness. The resulting residue is purified by column chromatography to afford pure compound 7 as a black solid (344 mg, 0.209 mmol, 85 %). **<sup>1</sup>H-NMR (CDCl<sub>3</sub>, 298 K, 400 MHz) δ (ppm):** 8.17 (d, <sup>3</sup>J = 16.3 Hz, 2H), 7.82 (d, <sup>3</sup>J = 8.3 Hz, 2H), 7.47 (d, <sup>3</sup>J = 8.8 Hz, 4H), 7.29 (d, <sup>3</sup>J = 16.3 Hz, 2H), 7.22-7.24 (m, 4H), 7.19 (d, <sup>3</sup>J = 3.8 Hz, 2H), 7.01-7.09 (m, 20H), 6.48 (s, 2H), 4.22 (s, 4H), 3.64-3.67 (m, 4H), 3.27-3.30 (m, 4H), 3.14 (s, 6H), 2.55 (t, <sup>3</sup>J = 7.9 Hz, 8H), 2.34 (s, 6H), 1.57-1.64 (m, 8H), 1.27-1.38 (m, 24H), 0.89 (t, <sup>3</sup>J = 6.7 Hz, 12H). **<sup>13</sup>C-NMR (CDCl<sub>3</sub>, 298 K, 100 MHz) δ (ppm):** 150.7, 148.4, 146.1, 145.0, 141.9, 138.4, 137.4, 133.0, 132.3, 130.3, 129.4, 128.8, 127.8, 127.0, 126.6, 125.0, 123.3, 122.2, 121.2, 102.1, 95.6, 71.8, 68.4, 59.6, 58.9, 35.6, 31.9, 31.6, 29.2, 22.8, 15.5, 14.3.



## Compound 8

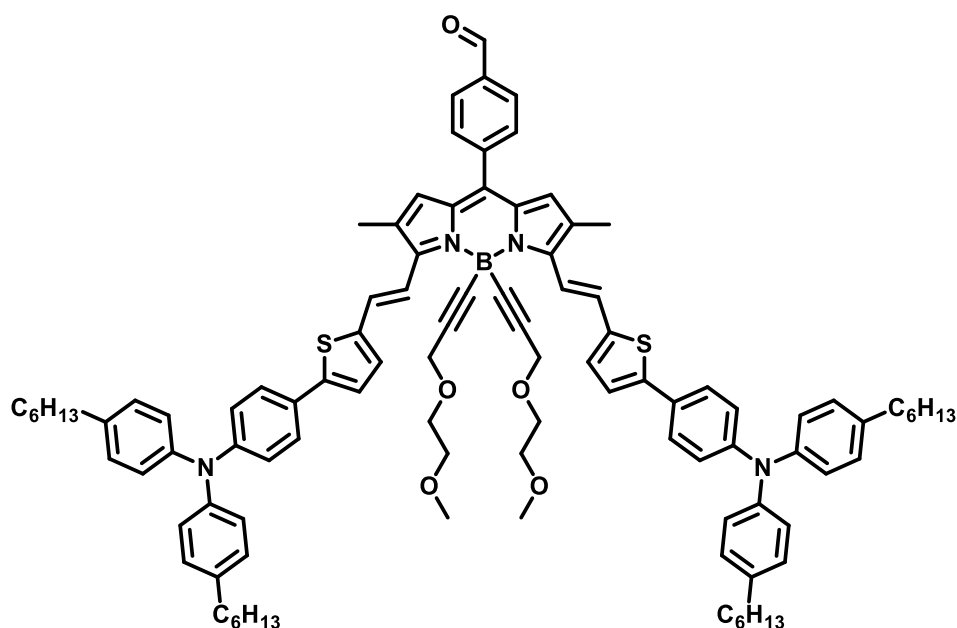

A solution of compound **7** (117 mg, 0.0714 mmol, 1.00 equiv) and sodium formiate (29 mg, 0.42 mmol, 6.0 equiv) in anhydrous DMF (5.0 mL) is degassed with a CO stream bubbling in the solution at 60 °C for 10 minutes. Pd(PPh<sub>3</sub>)<sub>2</sub>Cl<sub>2</sub> (5 mg, 0.0071 mmol, 10 mol%) is then

added and the reaction mixture is stirred at 100 °C under CO atmosphere for 6 hours. At rt, the reaction mixture is portioned between water (30 mL) and EtOAc (50 mL). The aqueous layer is extracted twice with EtOAc (2 × 15 mL). At rt, the combined organic layer is dried over MgSO<sub>4</sub>, filtered off and concentrated to dryness. The resulting residue is purified by column chromatography (Al<sub>2</sub>O<sub>3</sub>, DCM/PE 1:1) to afford pure compound **8** as a dark brown solid (21.7 mg, 0.0139 mmol, 19%). **<sup>1</sup>H-NMR (CD<sub>2</sub>Cl<sub>2</sub>, 298 K, 400 MHz) δ (ppm):** 10.11 (s, 1H), 8.14 (d, <sup>3</sup>J = 16.3 Hz, 2H), 7.99 (d, <sup>3</sup>J = 8.2 Hz, 2H), 7.70 (d, <sup>3</sup>J = 8.1 Hz, 2H), 7.49 (d, <sup>3</sup>J = 8.7 Hz, 4H), 7.37 (d, <sup>3</sup>J = 16.3 Hz, 2H), 7.25 (d, <sup>3</sup>J = 3.9 Hz, 2H), 7.22 (d, <sup>3</sup>J = 3.9 Hz, 2H), 7.08 (d, <sup>3</sup>J = 8.4 Hz, 8H), 7.01 (d, <sup>3</sup>J = 8.4 Hz, 8H), 6.98 (d, <sup>3</sup>J = 8.7 Hz, 4H), 6.52 (s, 2H), 4.14 (s, 4H), 3.56-3.58 (m, 4H), 3.24-3.26 (m, 4H), 3.08 (s, 6H), 2.55 (t, <sup>3</sup>J = 8.0 Hz; 8H), 2.36 (s, 6H), 1.55-1.61 (m, 8H), 1.28-1.37 (m, 24H), 0.87 (t, <sup>3</sup>J = 6.9 Hz, 12H). **<sup>13</sup>C-NMR (CD<sub>2</sub>Cl<sub>2</sub>, 298 K, 100 MHz) δ (ppm):** 192.0, 151.1, 148.8, 146.6, 145.2, 142.1, 141.3, 138.9, 137.2, 134.8, 133.2, 131.7, 131.0, 129.9, 129.7, 129.6, 128.7, 128.0, 127.0, 126.8, 125.4, 123.6, 122.1, 121.1, 92.8, 72.0, 68.9, 59.6, 58.8, 35.6, 32.2, 32.0, 29.5, 23.0, 15.5, 14.3.

### Compound BOD-TTPA-alk

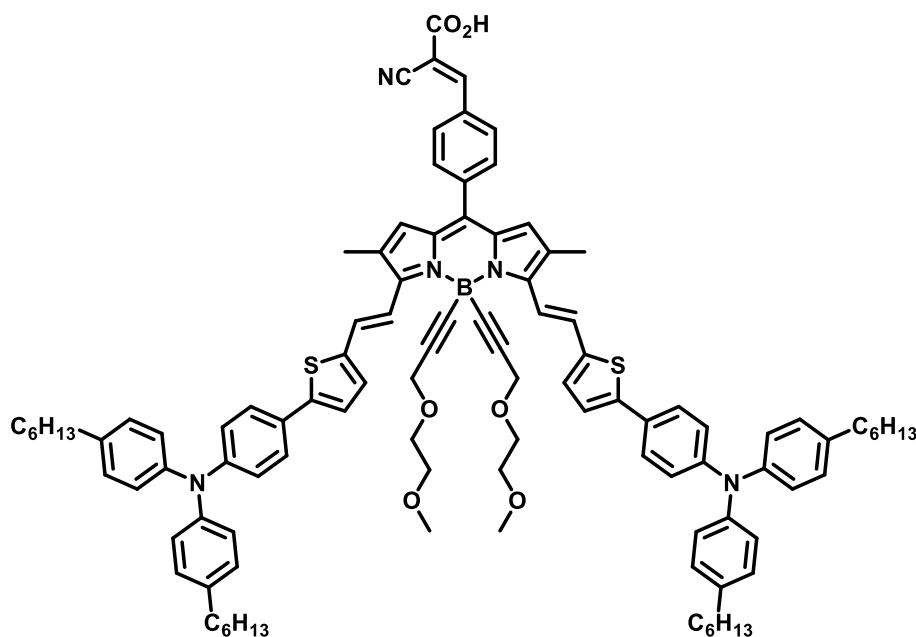

To a solution of compound **8** (36.9 mg, 0.0238 mmol, 1.00 equiv) in ACN and chloroform (6.0 mL and 2.0 mL, respectively) are successively added piperidine (0.5 mL) and cyanoacetic acid (20 mg, 0.238 mmol, 10 equiv). The reaction mixture is stirred at 70 °C overnight (18 h). At rt, the reaction mixture is portioned between water (30

mL) and EtOAc (50 mL). The aqueous layer is extracted twice with EtOAc (2 × 15 mL). At rt, the combined organic layer is dried over MgSO<sub>4</sub>, filtered off and concentrated to dryness. The resulting residue is purified by column chromatography (SiO<sub>2</sub>, DCM/EtOH 95:5 to DCM/EtOAc/EtOH 1:1:2) to afford **BOD-TTPA-alk** as a dark brown solid (10 mg, 0.00617 mmol, 26 %). <sup>1</sup>H-NMR (CDCl<sub>3</sub>, 298 K, 400 MHz) δ (ppm): 8.14 (d, J = 1.4 Hz, 2H), 7.61–7.48 (bs, 1H), 7.34–7.47 (m, 4H), 7.13–7.21 (m, 2H); 6.83–7.09 (m, 28 H), 6.30–6.49 (bs, 2H), 4.07–4.30 (bs, 4H), 3.57–3.72 (bs, 4H), 3.19–3.30 (bs, 4H), 3.02–3.14 (bs, 6H), 2.47–2.58 (m, 8H), 1.53–1.63 (m, 6H), 1.17–1.37 (m, 42 H). HRMS (ESI-TOF): Calculated for C<sub>105</sub>H<sub>116</sub>BN<sub>5</sub>O<sub>6</sub>S<sub>2</sub>: 1617.8460, found [M+H]<sup>+</sup> 1618.8495.

### Compound 9

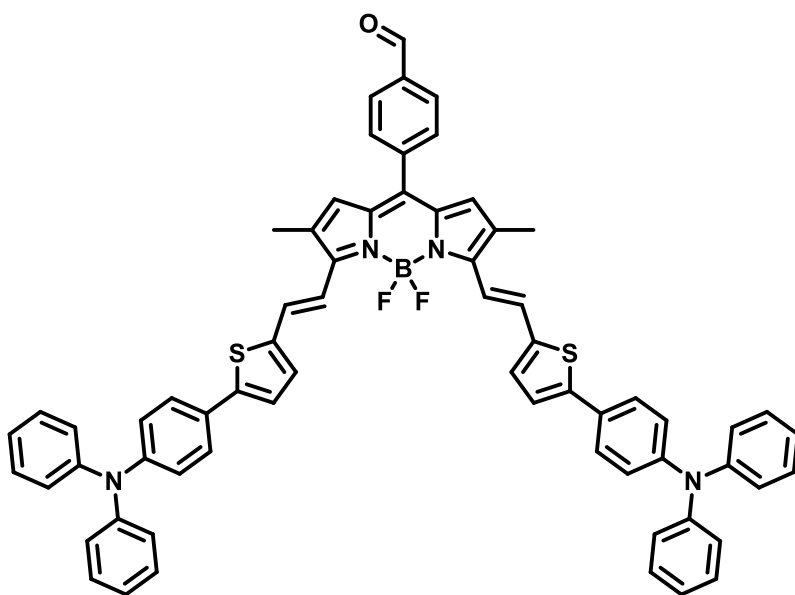

A solution of compound **5** (100 mg, 0.0896 mmol, 1.00 equiv) and sodium formiate (37 mg, 0.53 mmol, 6.0 equiv) in anhydrous DMF (5.0 mL) is degassed with a CO stream bubbling in the solution at 60 °C for 10 minutes. Pd(PPh<sub>3</sub>)<sub>2</sub>Cl<sub>2</sub> (6.0 mg, 0.01096 mmol, 10 mol %) is then added and the reaction mixture is stirred at 100 °C under CO atmosphere for 6 hours. At rt, the reaction mixture is portioned between water (30 mL) and EtOAc (50 mL). The aqueous layer is extracted twice with EtOAc (2 × 15 mL). At rt, the combined organic layer is dried over MgSO<sub>4</sub>, filtered off and concentrated to dryness. The resulting residue is purified by column chromatography (PE/DCM) to afford pure compound **9** as a dark brown solid (33 mg, 0.032 mmol, 35%). **<sup>1</sup>H-NMR (CD<sub>2</sub>Cl<sub>2</sub>, 298 K, 400 MHz) δ (ppm):** 10.10 (s, 1H), 7.99 (d, <sup>3</sup>J = 7.9 Hz, 2H), 7.68 (d, <sup>3</sup>J = 8.0 Hz, 2H), 7.50-7.54 (m, 8H), 1.24-7.29 (m, 12H, 7.02-7.11 (m, 16H), 6.50 (s, 2H), 2.33 (s, 6H). **<sup>13</sup>C-NMR (CDCl<sub>3</sub>, 298 K, 100 MHz) δ (ppm):** 191.7, 165.4, 165.0, 151.6, 147.8, 147.3, 146.3, 141.5, 141.0, 134.9, 131.1, 130.0, 139.8, 129.7, 129.4, 129.3, 128.7, 127.8, 126.7, 124.7, 123.3, 123.3, 118.6, 14.9.

### Compound BOD-TTPA

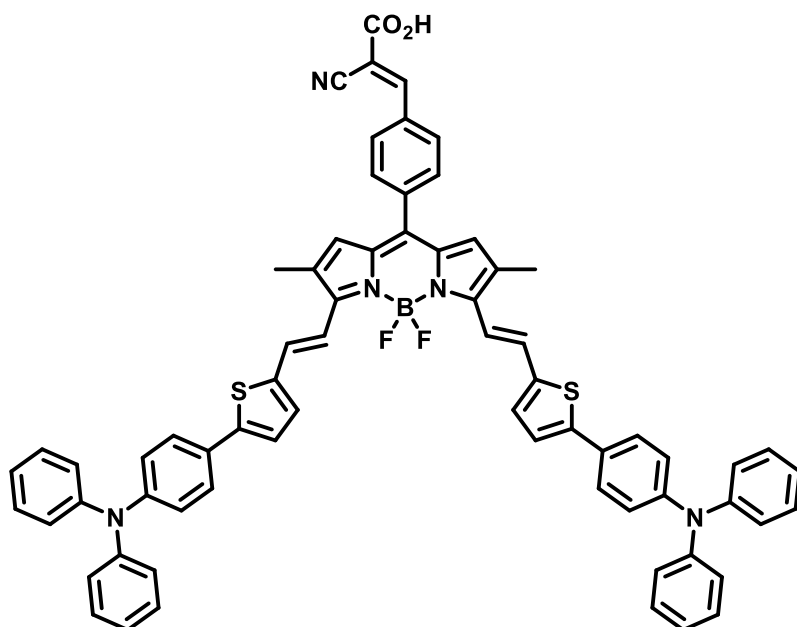

To a solution of compound **10** (33 mg, 0.0322 mmol, 1.00 equiv) in ACN and chloroform (6.0 mL and 2.0 mL respectively) are successively added piperidine (0.5 mL) and cyanoacetic acid (2.7 mg, 0.0322 mmol, 1.00 equiv). The reaction mixture is stirred at 70 °C overnight (18 h). At rt, the reaction mixture is portioned between water (30 mL) and EtOAc (50 mL). The aqueous layer is extracted twice with EtOAc (2 × 15 mL). The combined organic layer is dried over MgSO<sub>4</sub>, filtered off and concentrated to dryness. The resulting residue is purified by column chromatography (SiO<sub>2</sub>, DCM/EtOH 95:5 to DCM/EtOAc/EtOH 1:1:2) to afford pure compound **9** as a dark brown solid (12 mg, 0.00617 mmol, 34%). **<sup>1</sup>H-NMR (CDCl<sub>3</sub>, 298 K, 400 MHz) δ (ppm):** 11.65 (bs, 1H), 7.58 (s, 1H), 7.37-7.40 (m, 3H), 6.93 (d, <sup>3</sup>J = 8.3 Hz, 2H), 6.76-6.86 (m, 8H), 6.55-6.61 (m, 11H), 6.35-6.46 (m, 16H), 5.88 (s, 2H), 1.55 (s, 6H). **<sup>13</sup>C-NMR (CDCl<sub>3</sub>, 298 K, 100 MHz) δ (ppm):** 178.6, 150.7, 150.1, 147.2, 146.5, 145.7, 140.8, 134.3, 133.0, 130.6, 130.1, 129.6, 129.4, 129.2, 128.9, 126.8, 126.1, 124.2, 122.9, 122.8, 122.6, 117.9, 117.5, 14.4. **HRMS (ESI-TOF):** Calculated for C<sub>69</sub>H<sub>50</sub>BF<sub>2</sub>N<sub>5</sub>O<sub>2</sub>S<sub>2</sub>: 1093.3473, found [M]<sup>+</sup>: 1093.3450.

## NMR spectra

Figure S1:  $^1\text{H}$ -NMR of compound 1 (acetone- $d_6$ , 400 MHz, 298 K)

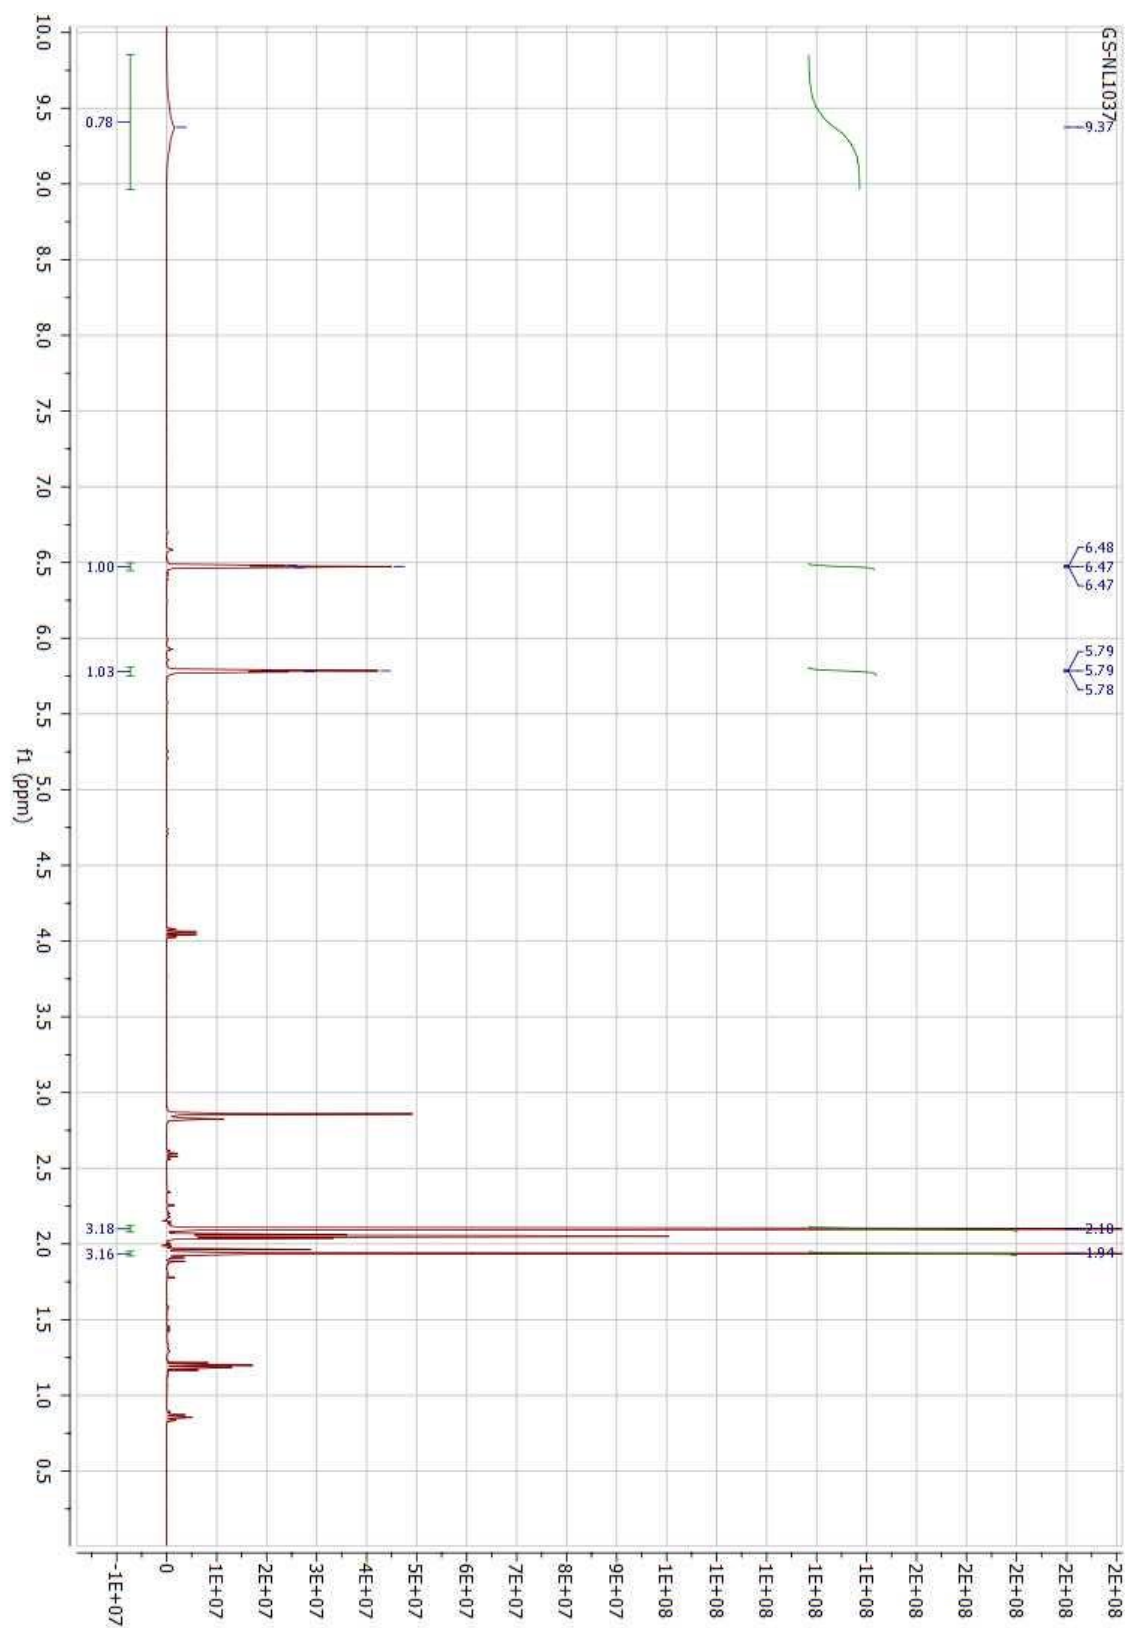

Figure S2:  $^{13}\text{C}$ -NMR of compound 1 (acetone- $d_6$ , 100 MHz, 298 K)

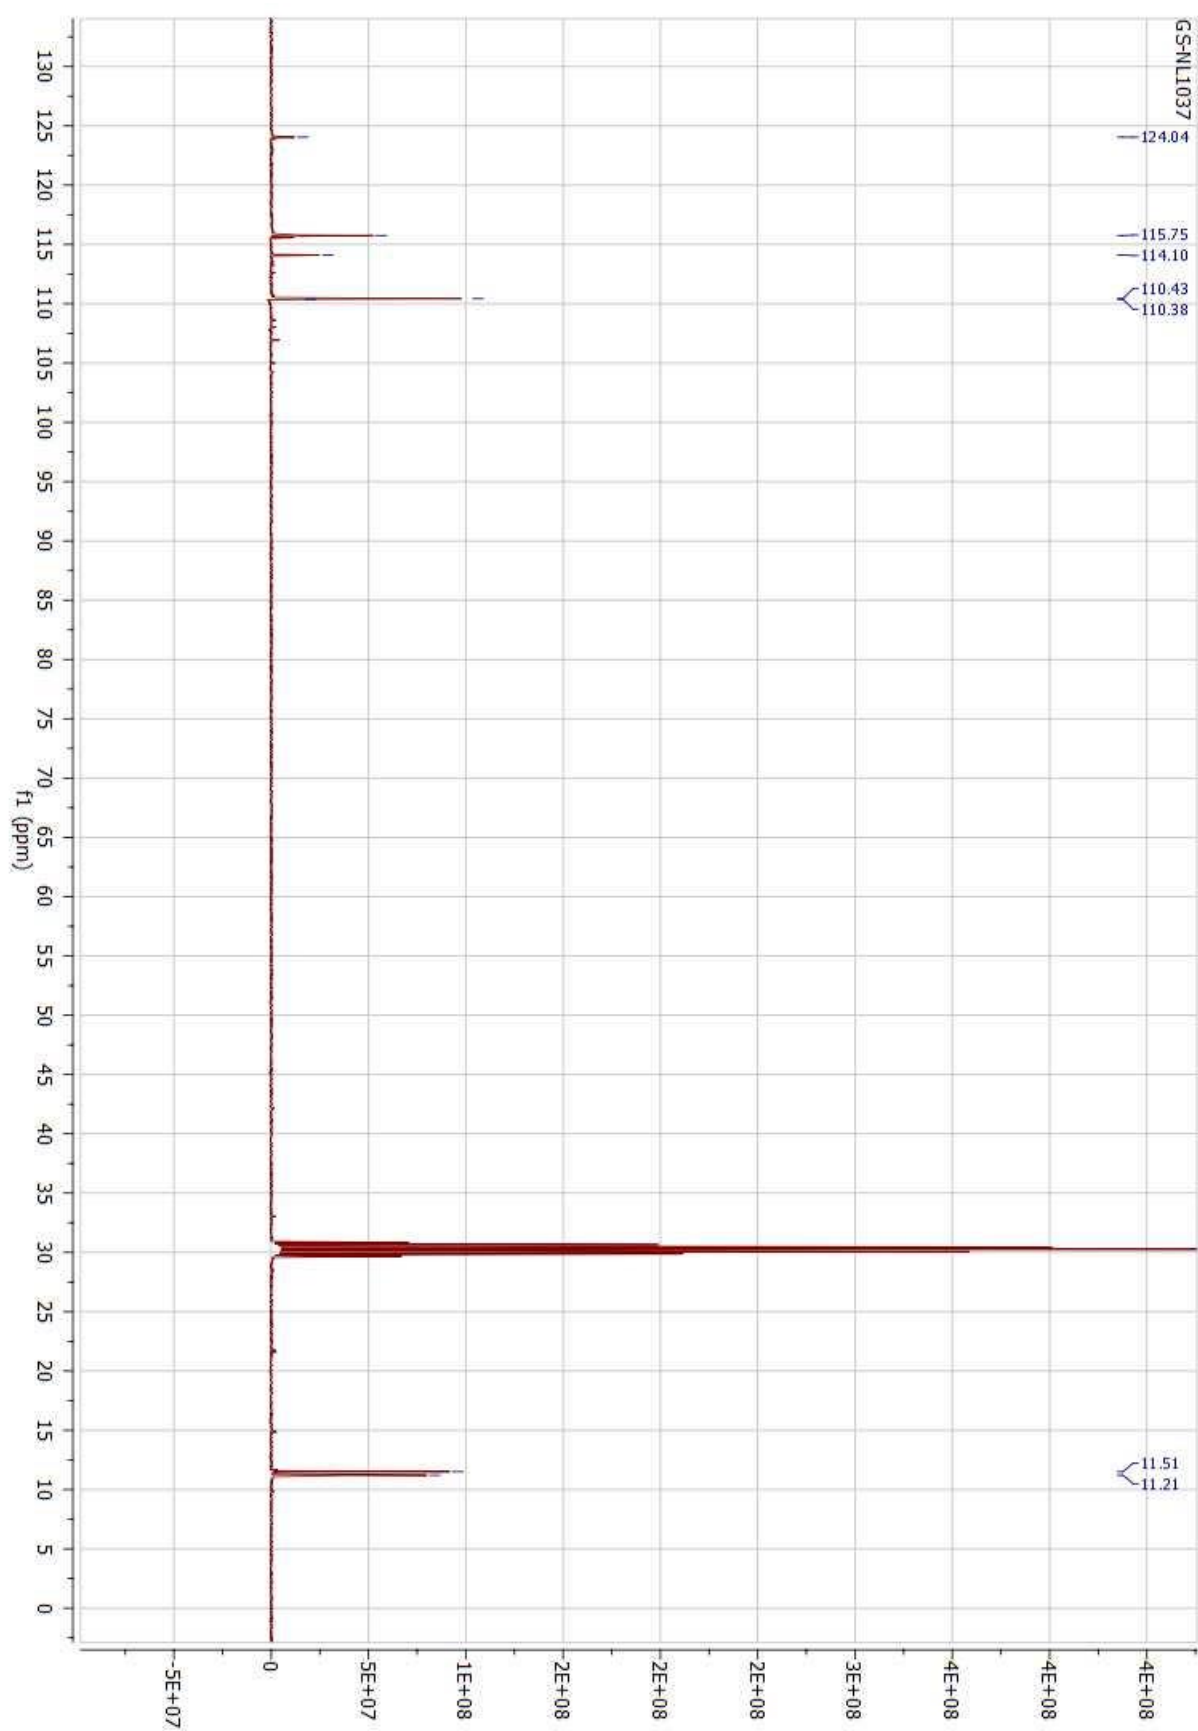

Figure S3:  $^1\text{H}$ -NMR of compound 2 ( $\text{CDCl}_3$ , 400 MHz, 298 K)

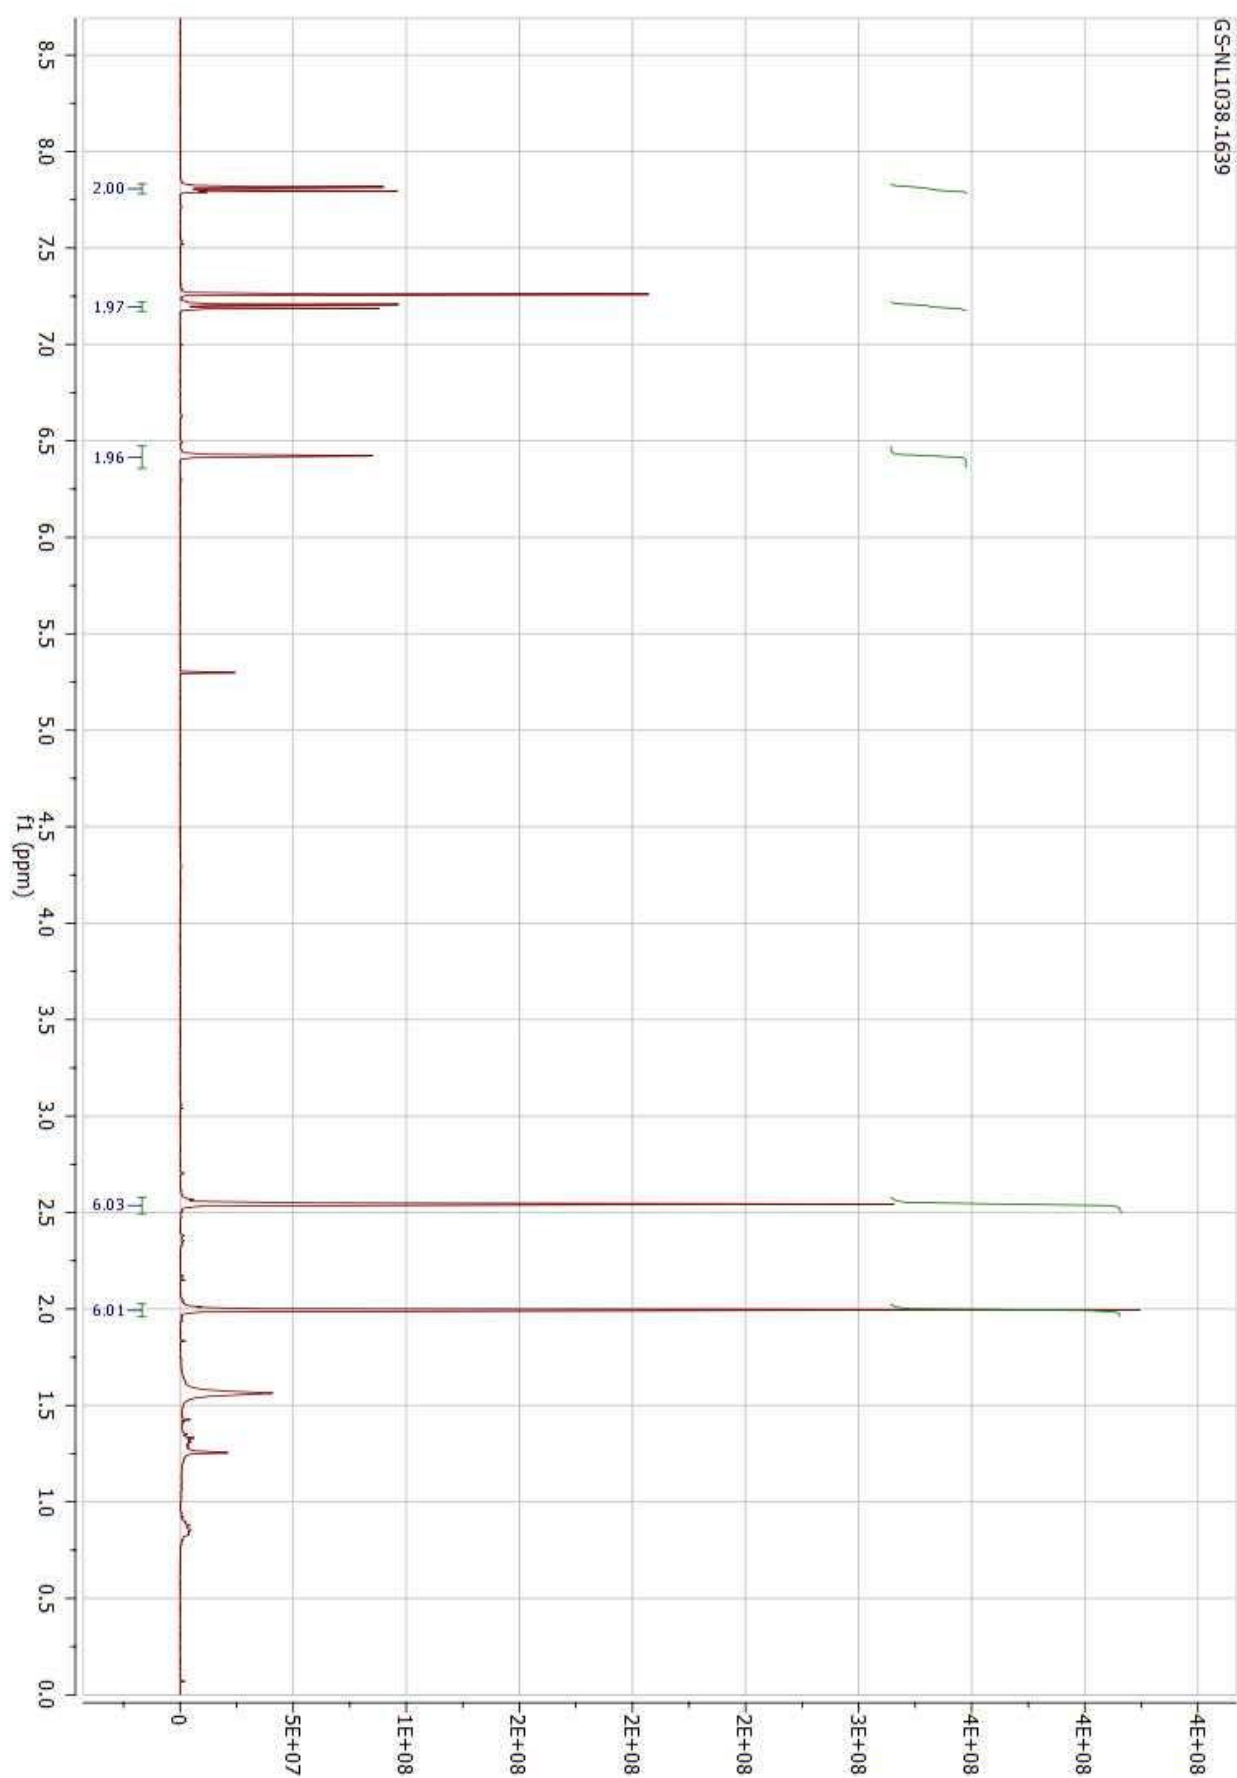

Figure S4:  $^{13}\text{C}$ -NMR of compound 2 ( $\text{CDCl}_3$ , 100 MHz, 298 K)

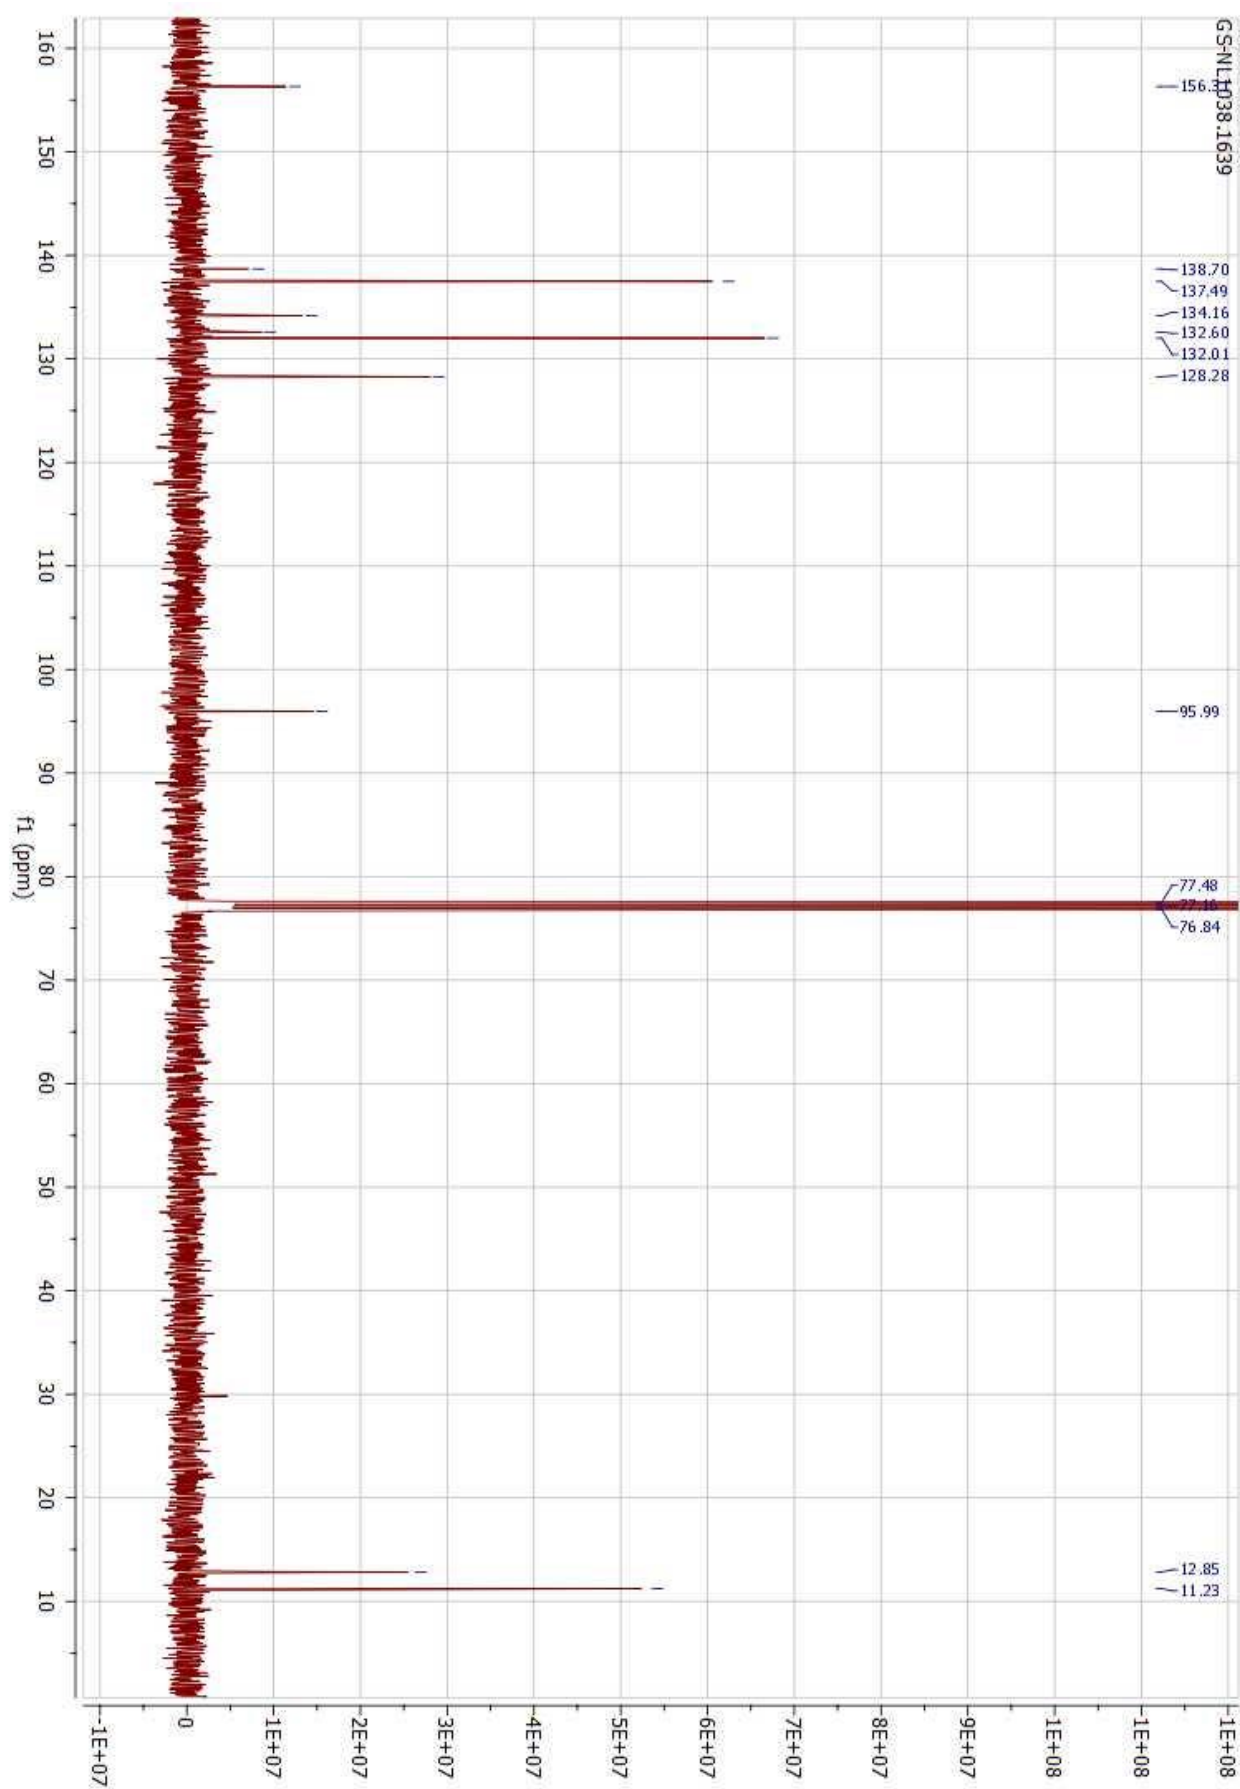

Figure S5:  $^1\text{H}$ -NMR of compound 3 ( $\text{CDCl}_3$ , 400 MHz, 298 K)

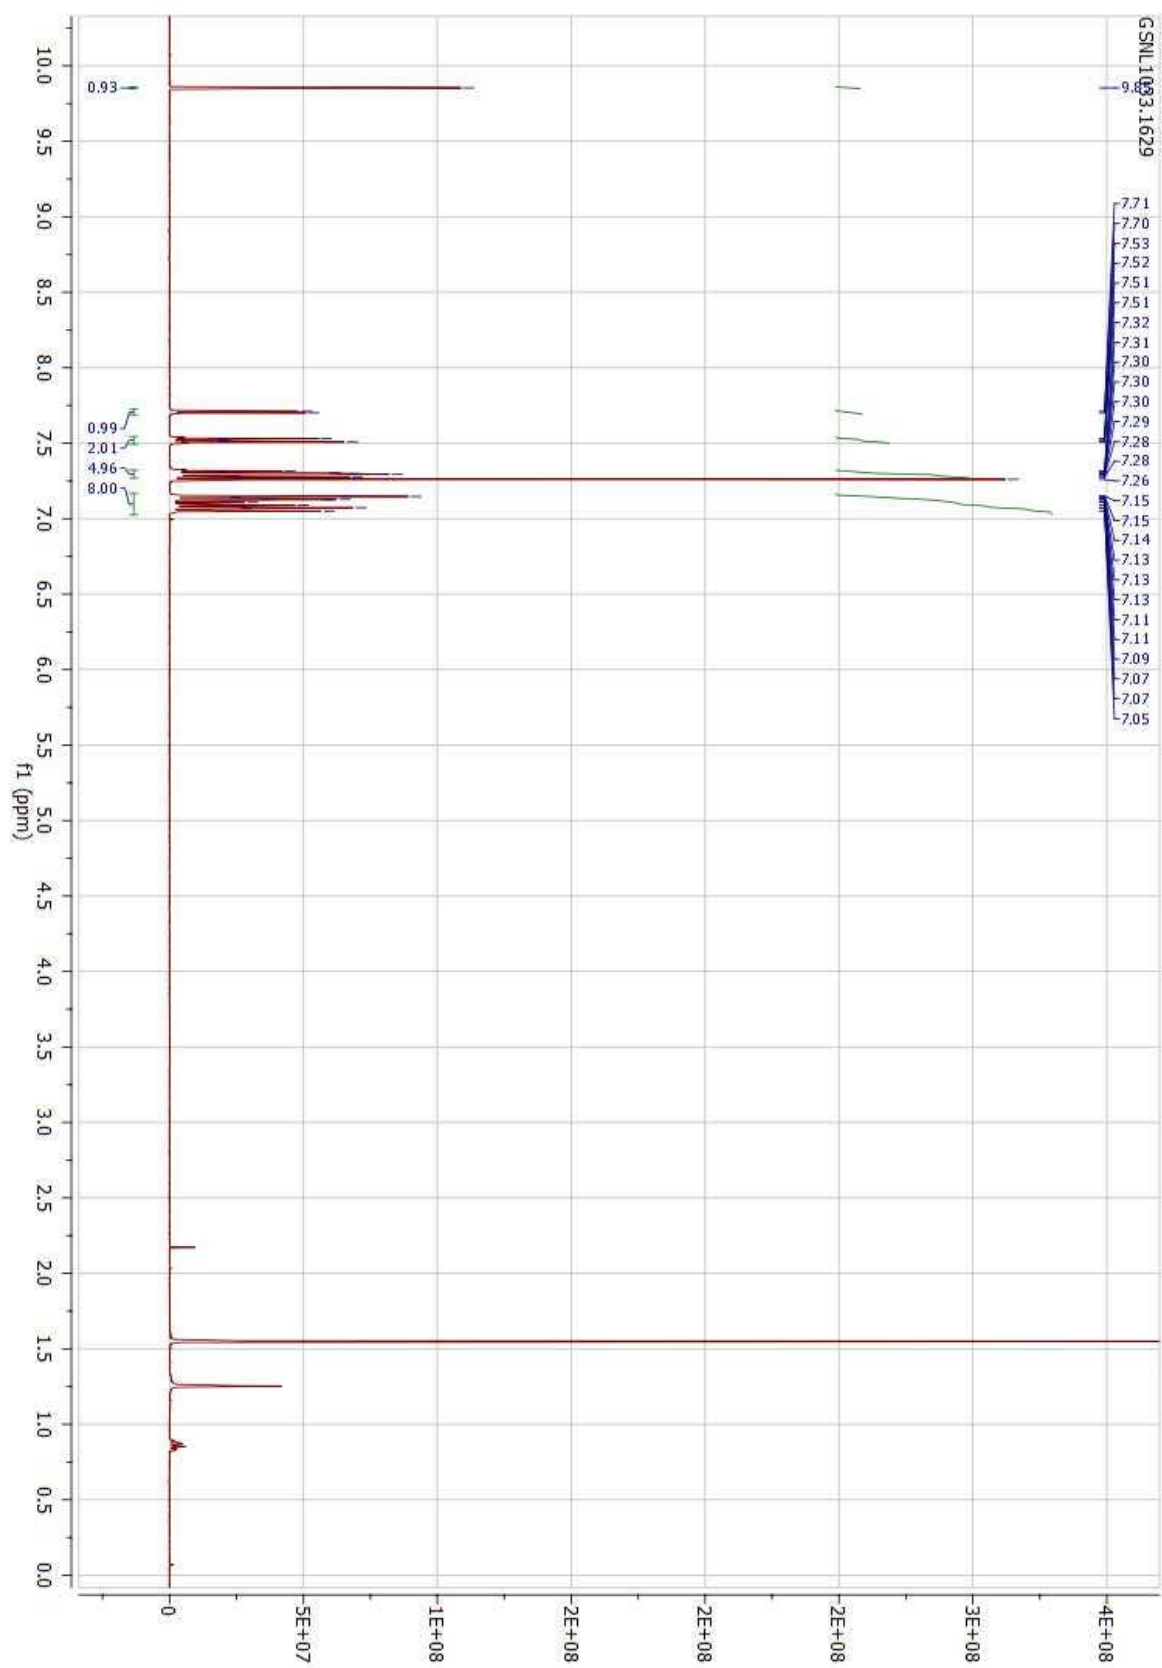



Figure S6:  $^{13}\text{C}$ -NMR of compound 3 ( $\text{CDCl}_3$ , 100 MHz, 298 K)

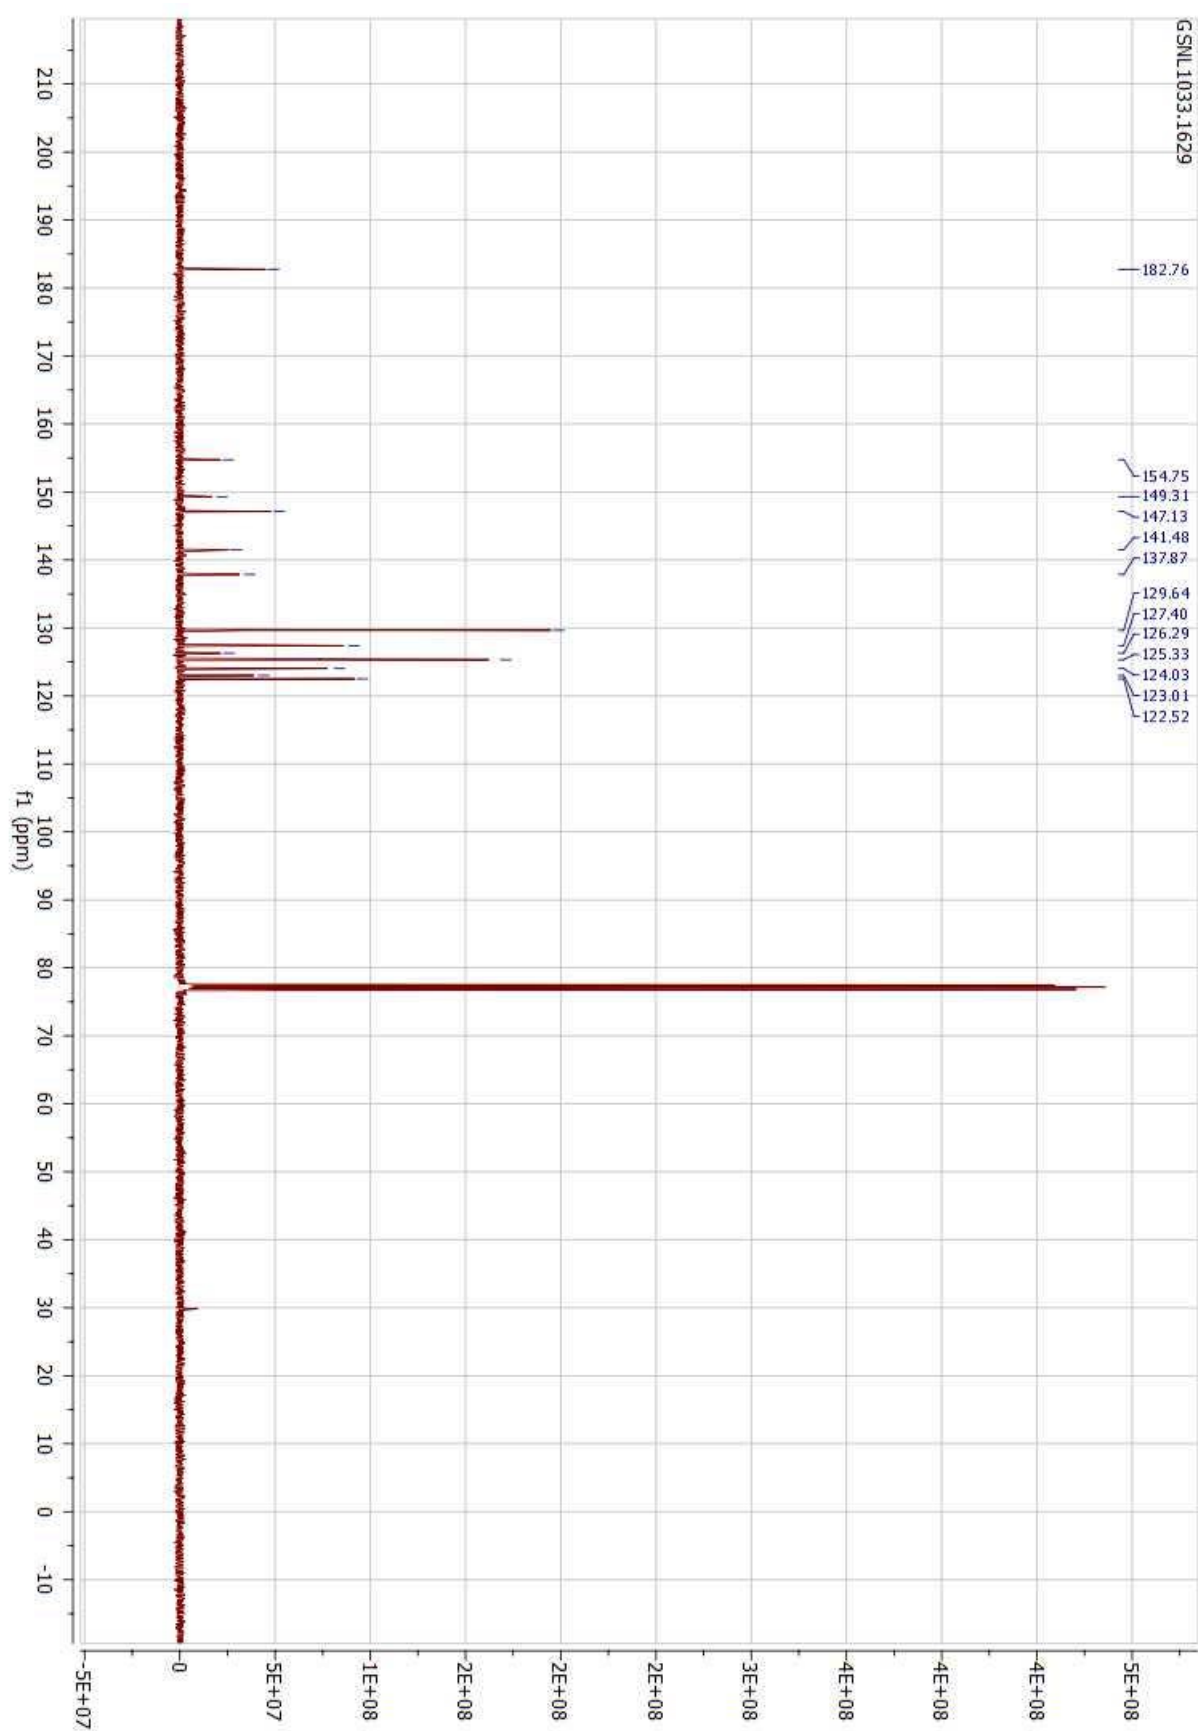

**Figure S7:  $^1\text{H}$ -NMR of compound 4 ( $\text{CDCl}_3$ , 400 MHz, 298 K)**

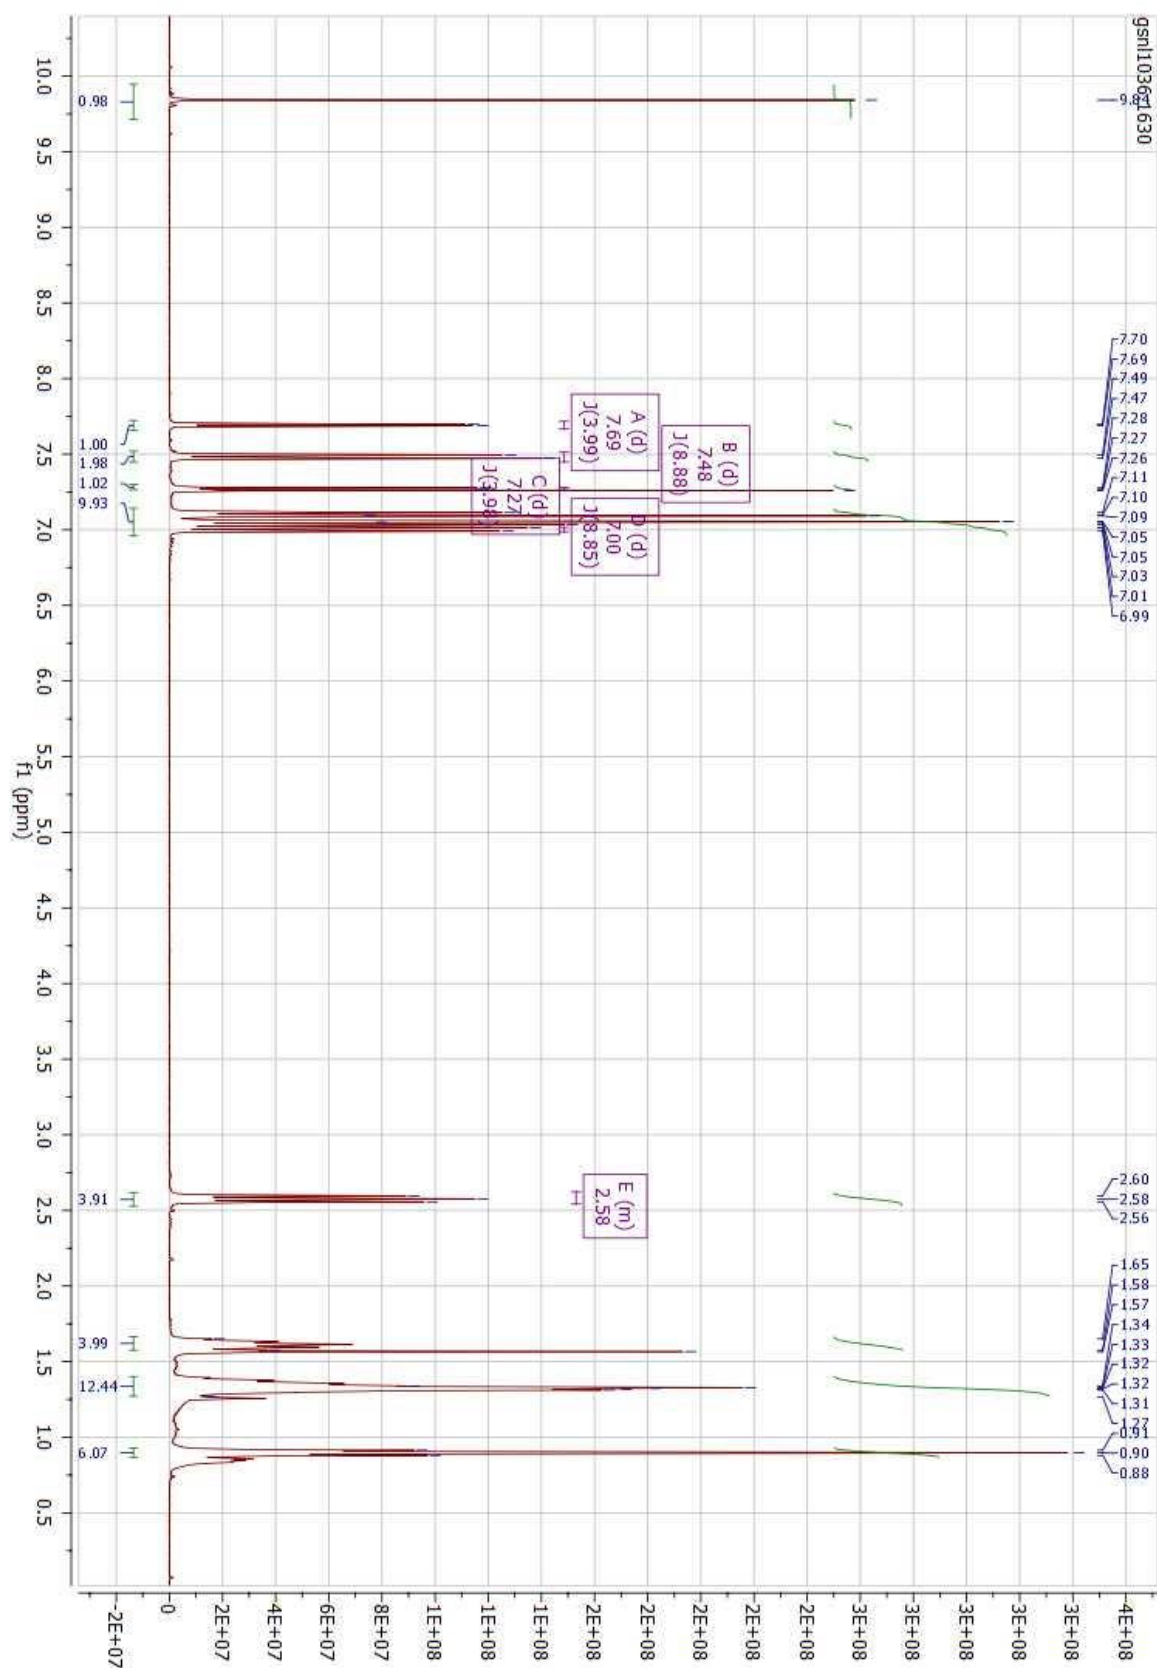

Figure S8:  $^{13}\text{C}$ -NMR of compound 4 ( $\text{CDCl}_3$ , 100 MHz, 298 K)

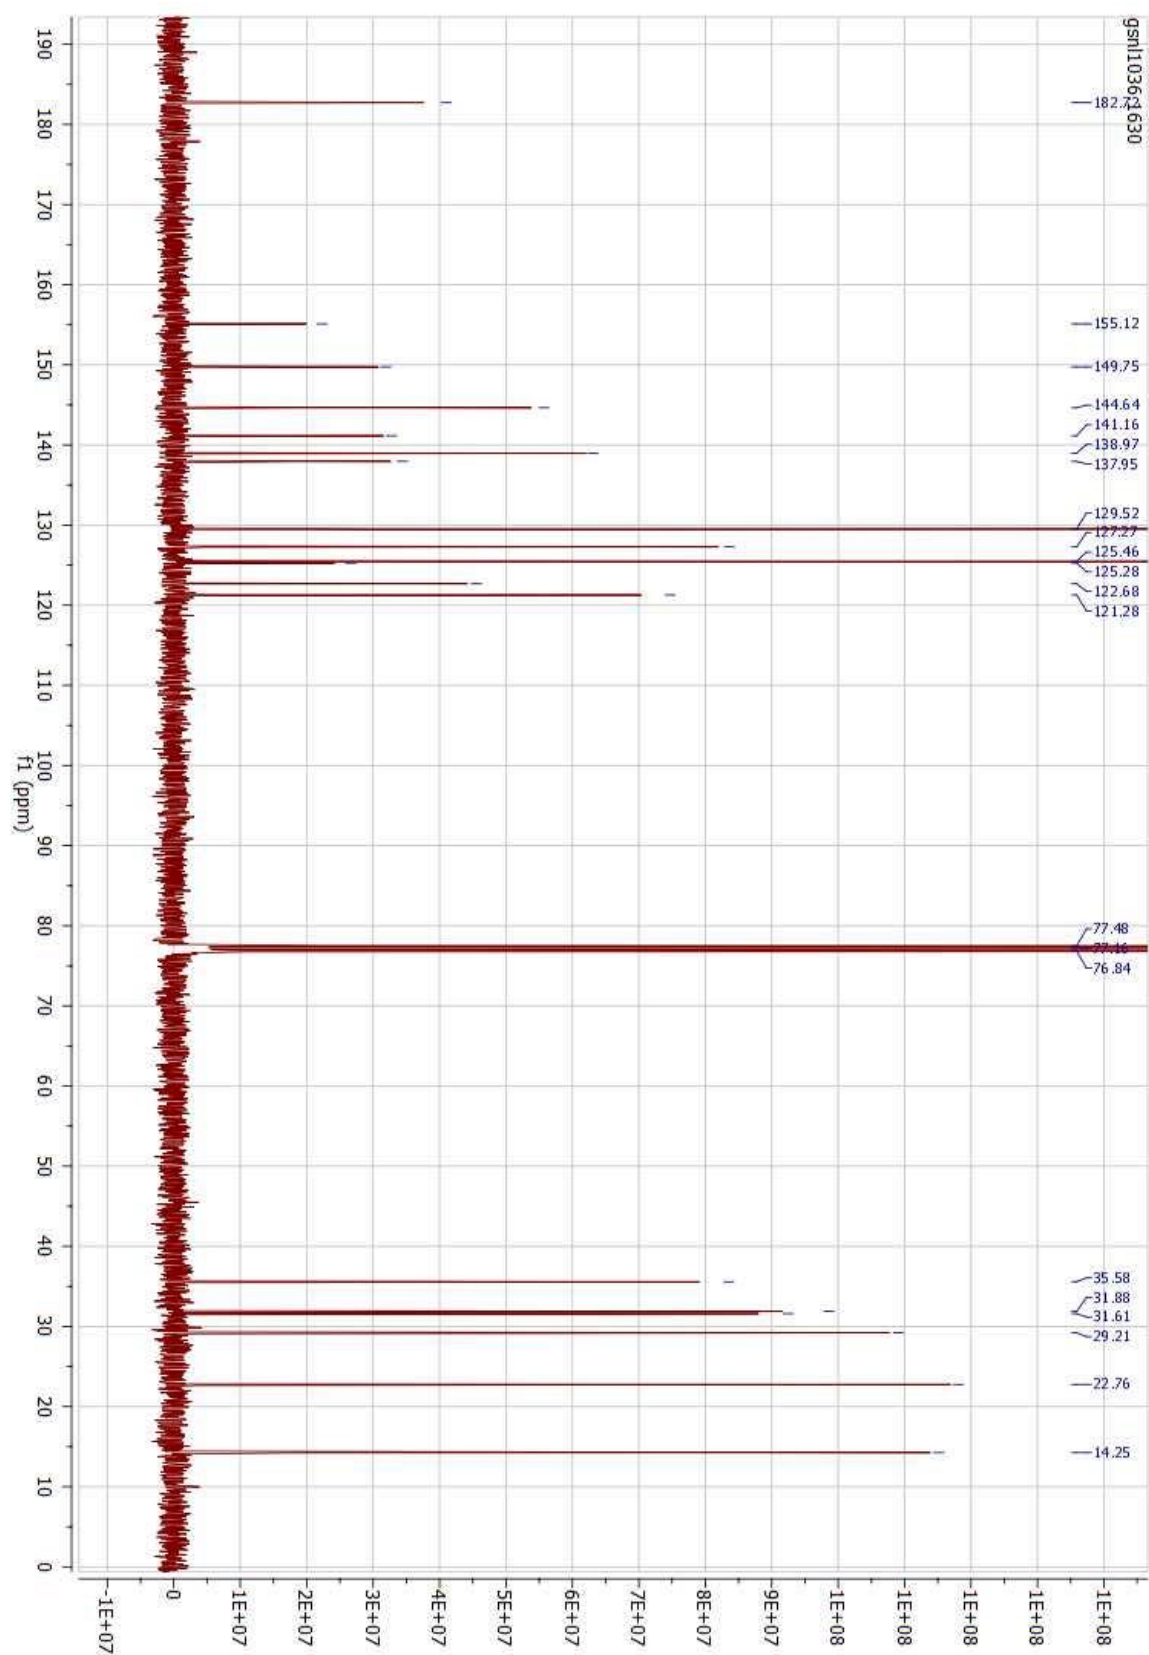

Figure S9:  $^1\text{H}$ -NMR of compound 5 ( $\text{CDCl}_3$ , 400 MHz, 298 K)

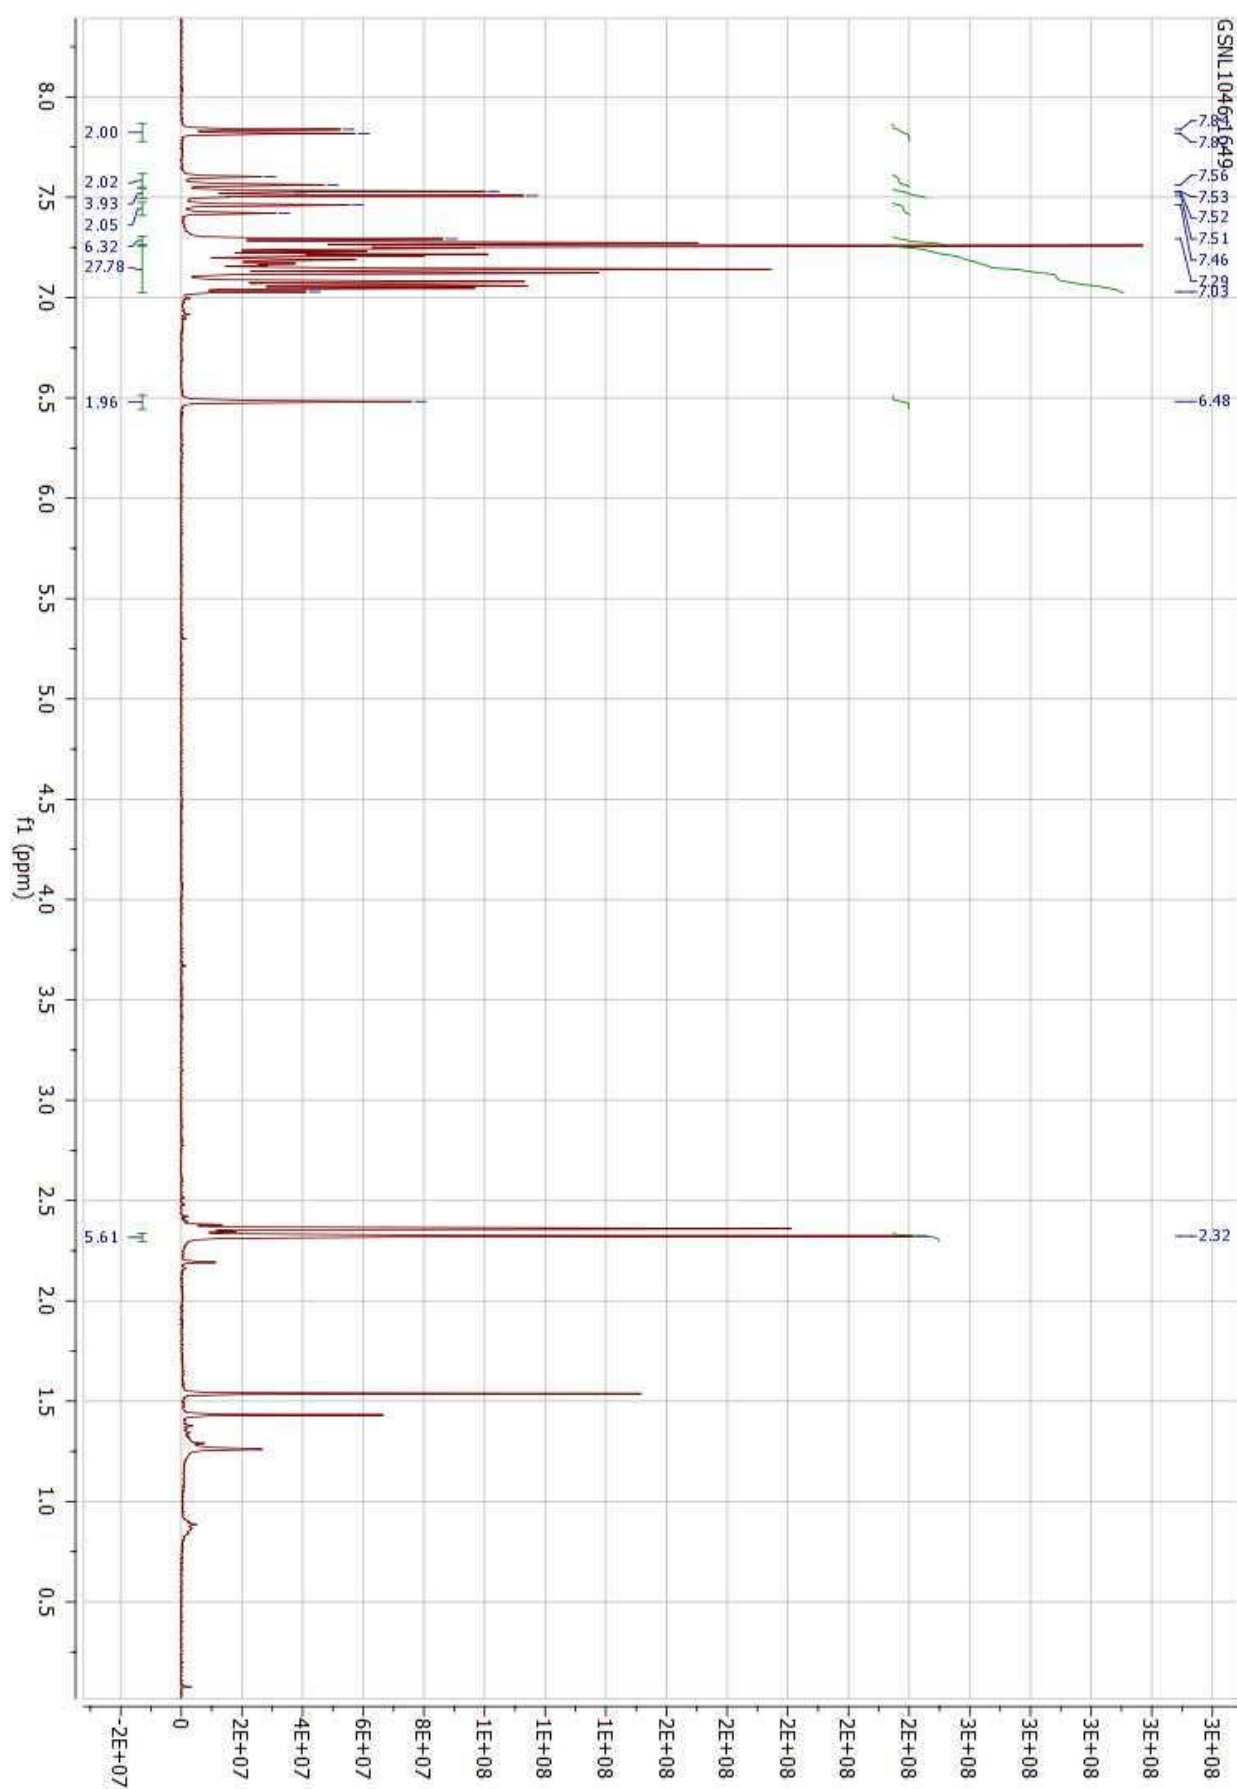

Figure S10:  $^{13}\text{C}$ -NMR of compound 5 ( $\text{CDCl}_3$ , 100 MHz, 298 K)

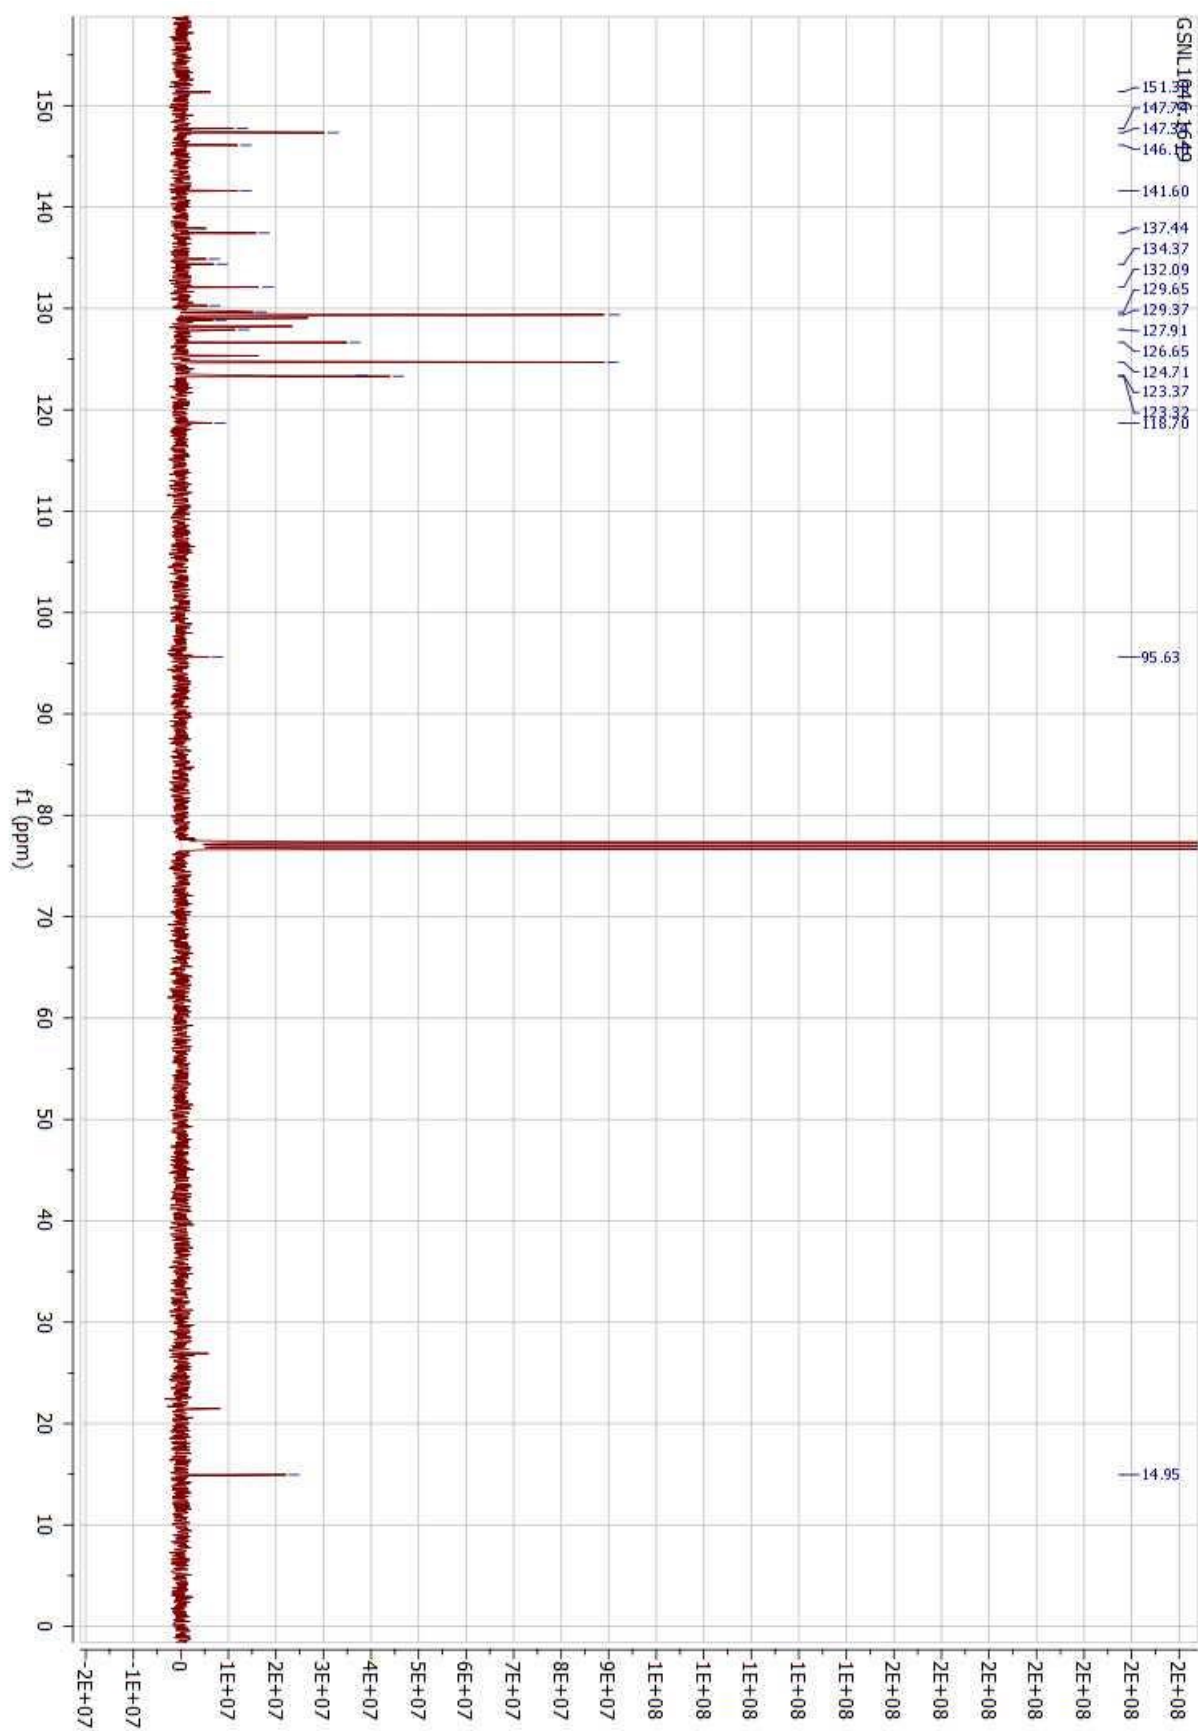

Figure S11:  $^1\text{H}$ -NMR of compound 6 ( $\text{CDCl}_3$ , 400 MHz, 298 K)

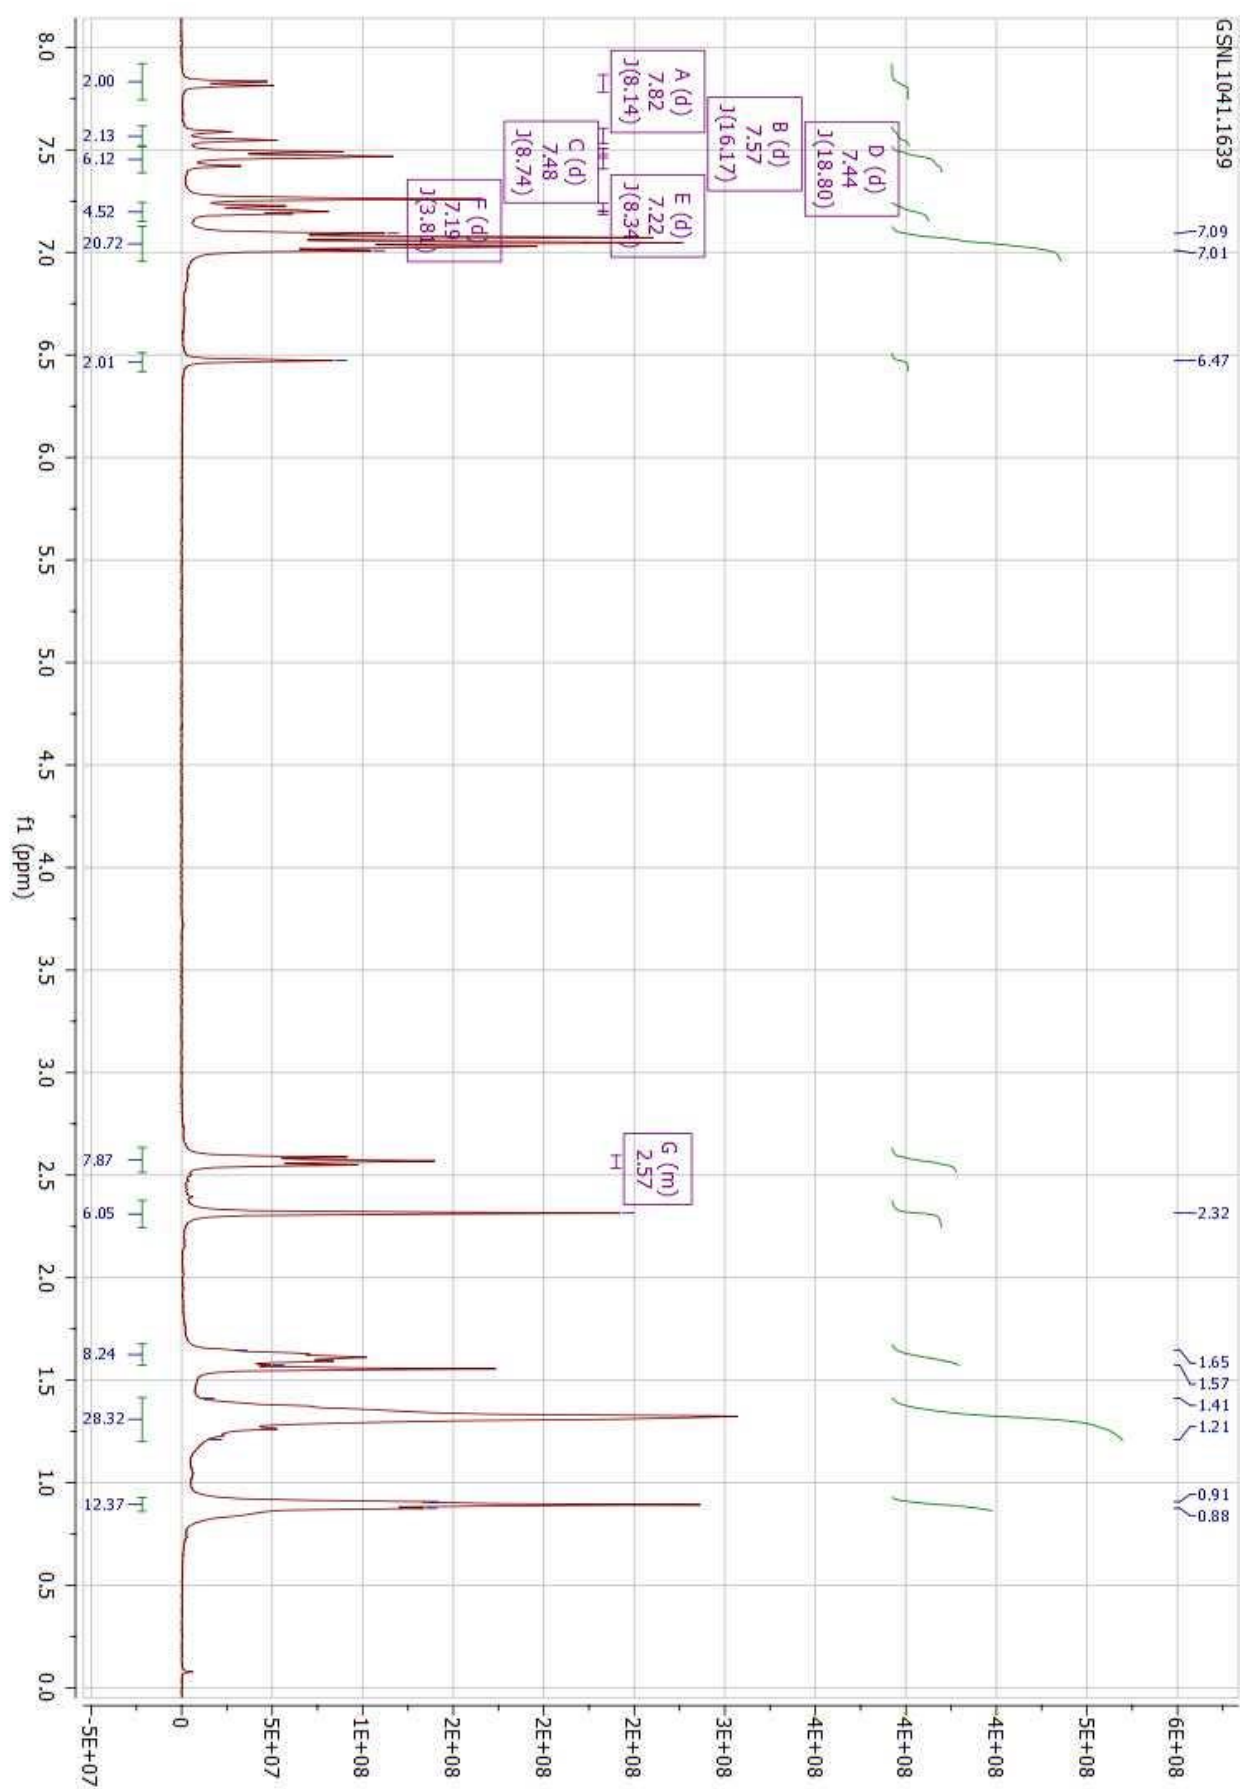

Figure S12:  $^{13}\text{C}$ -NMR of compound 6 ( $\text{CDCl}_3$ , 100 MHz, 298 K)

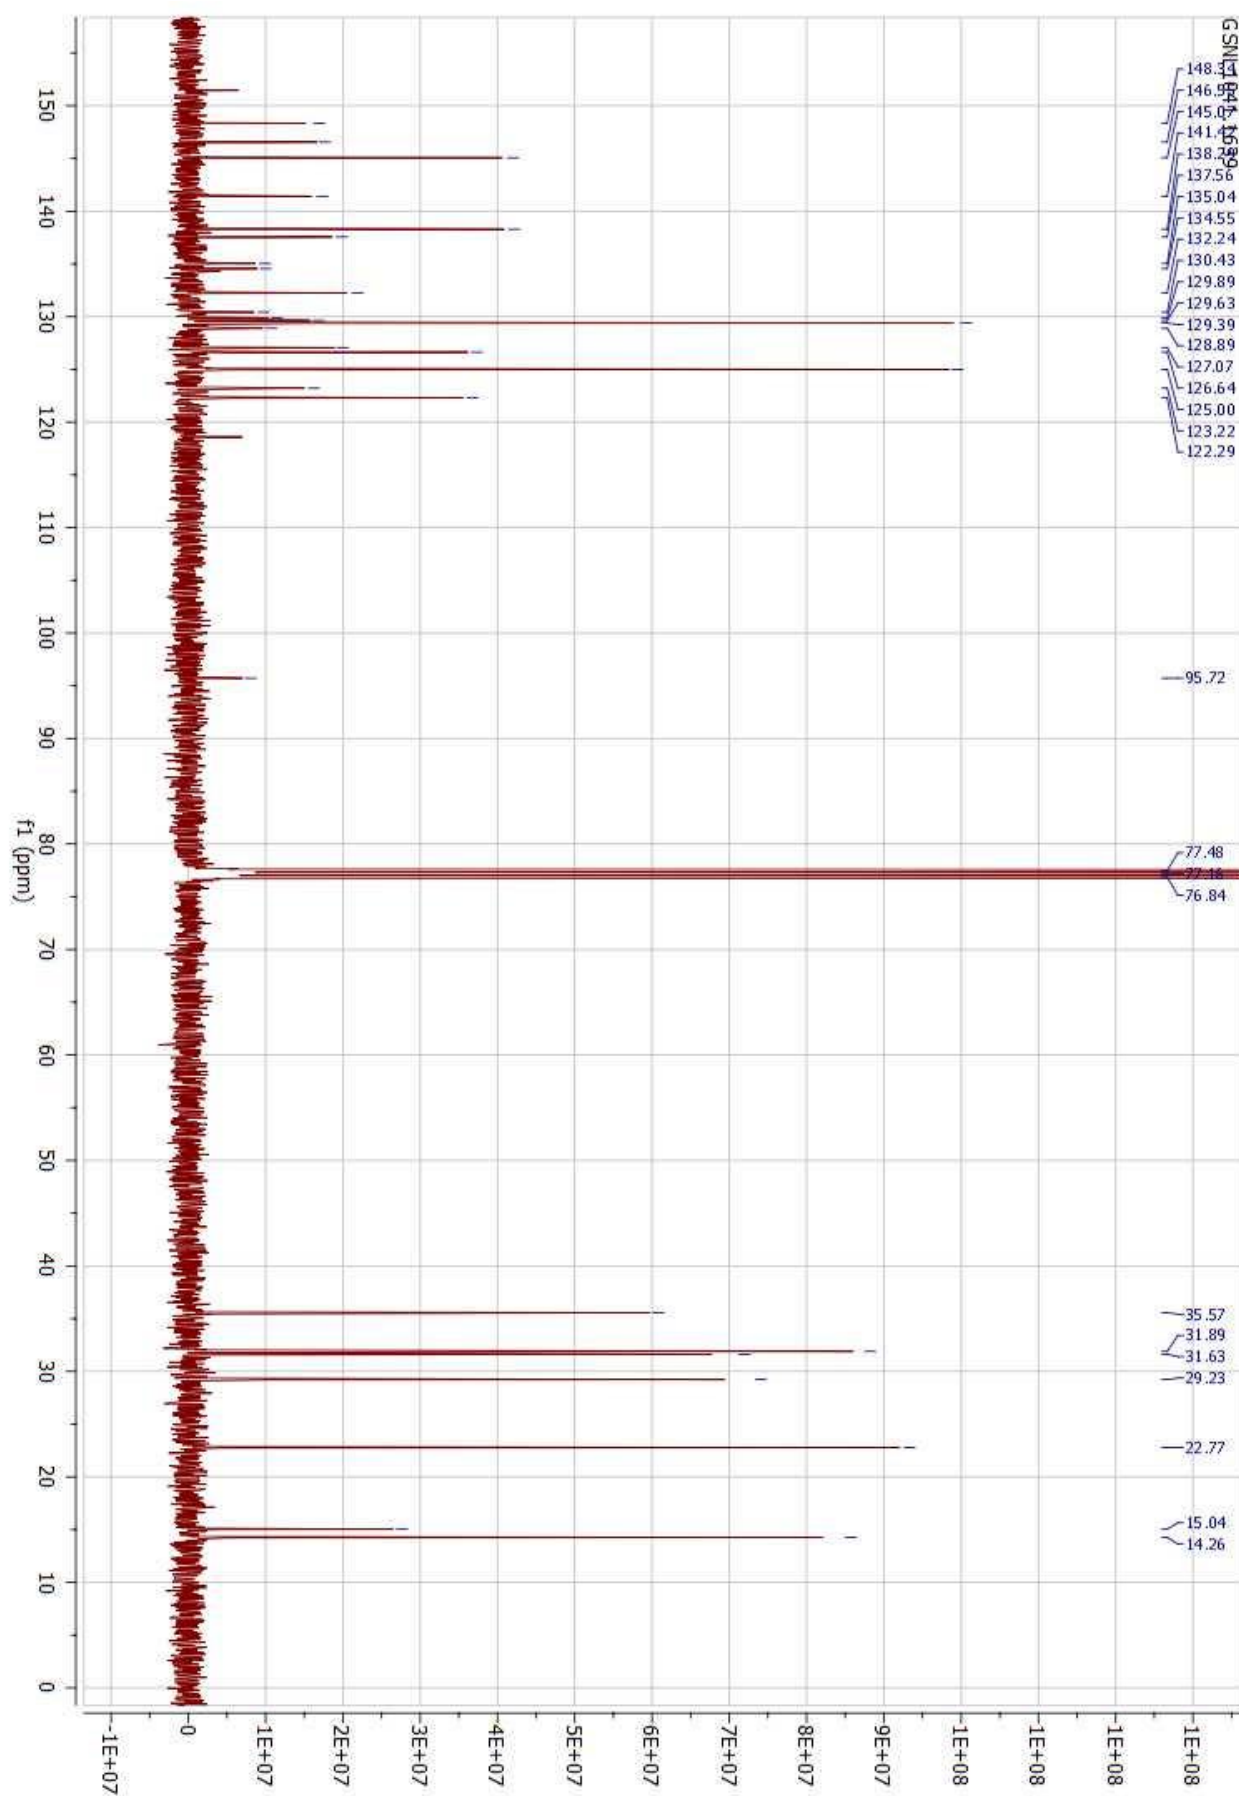



Figure S13:  $^1\text{H}$ -NMR of compound 7 ( $\text{CDCl}_3$ , 400 MHz, 298 K)

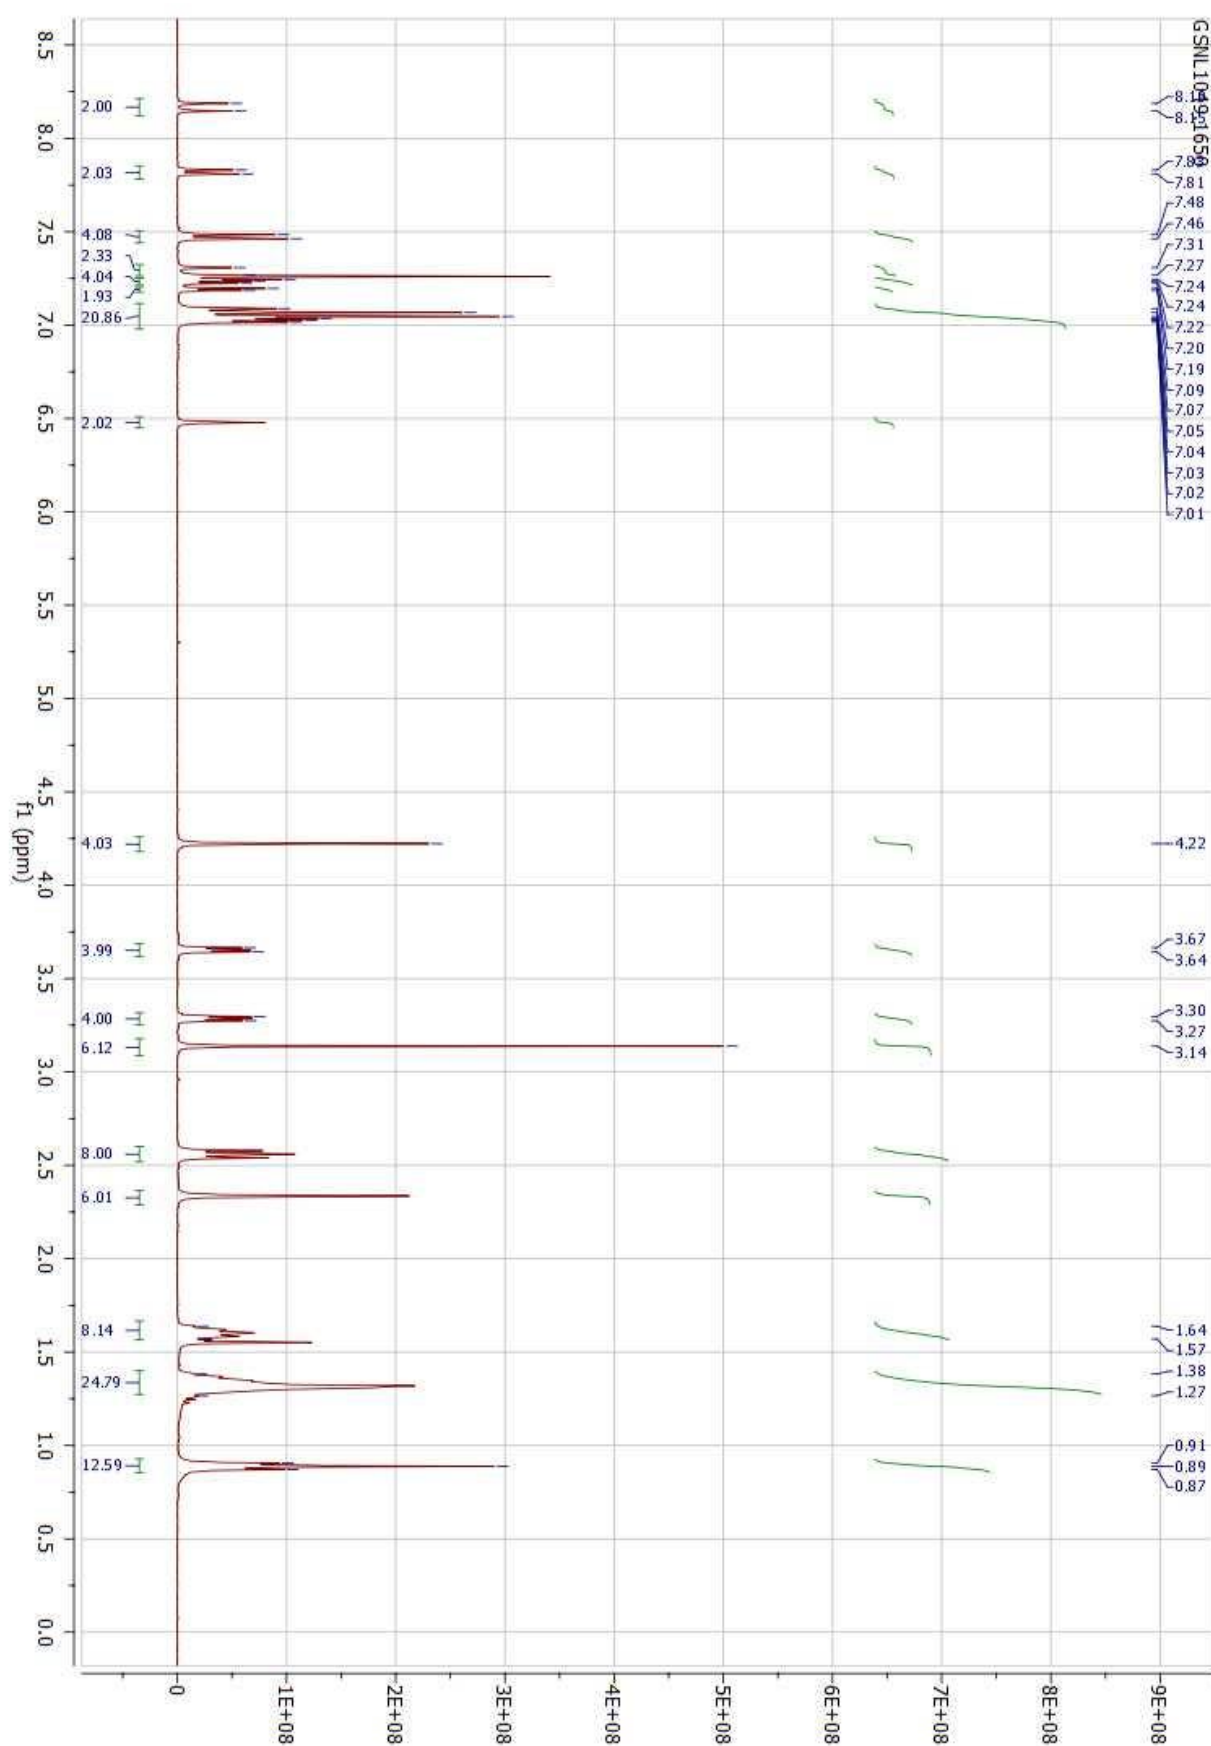



Figure S14:  $^{13}\text{C}$ -NMR of compound 7 ( $\text{CDCl}_3$ , 100 MHz, 298 K)

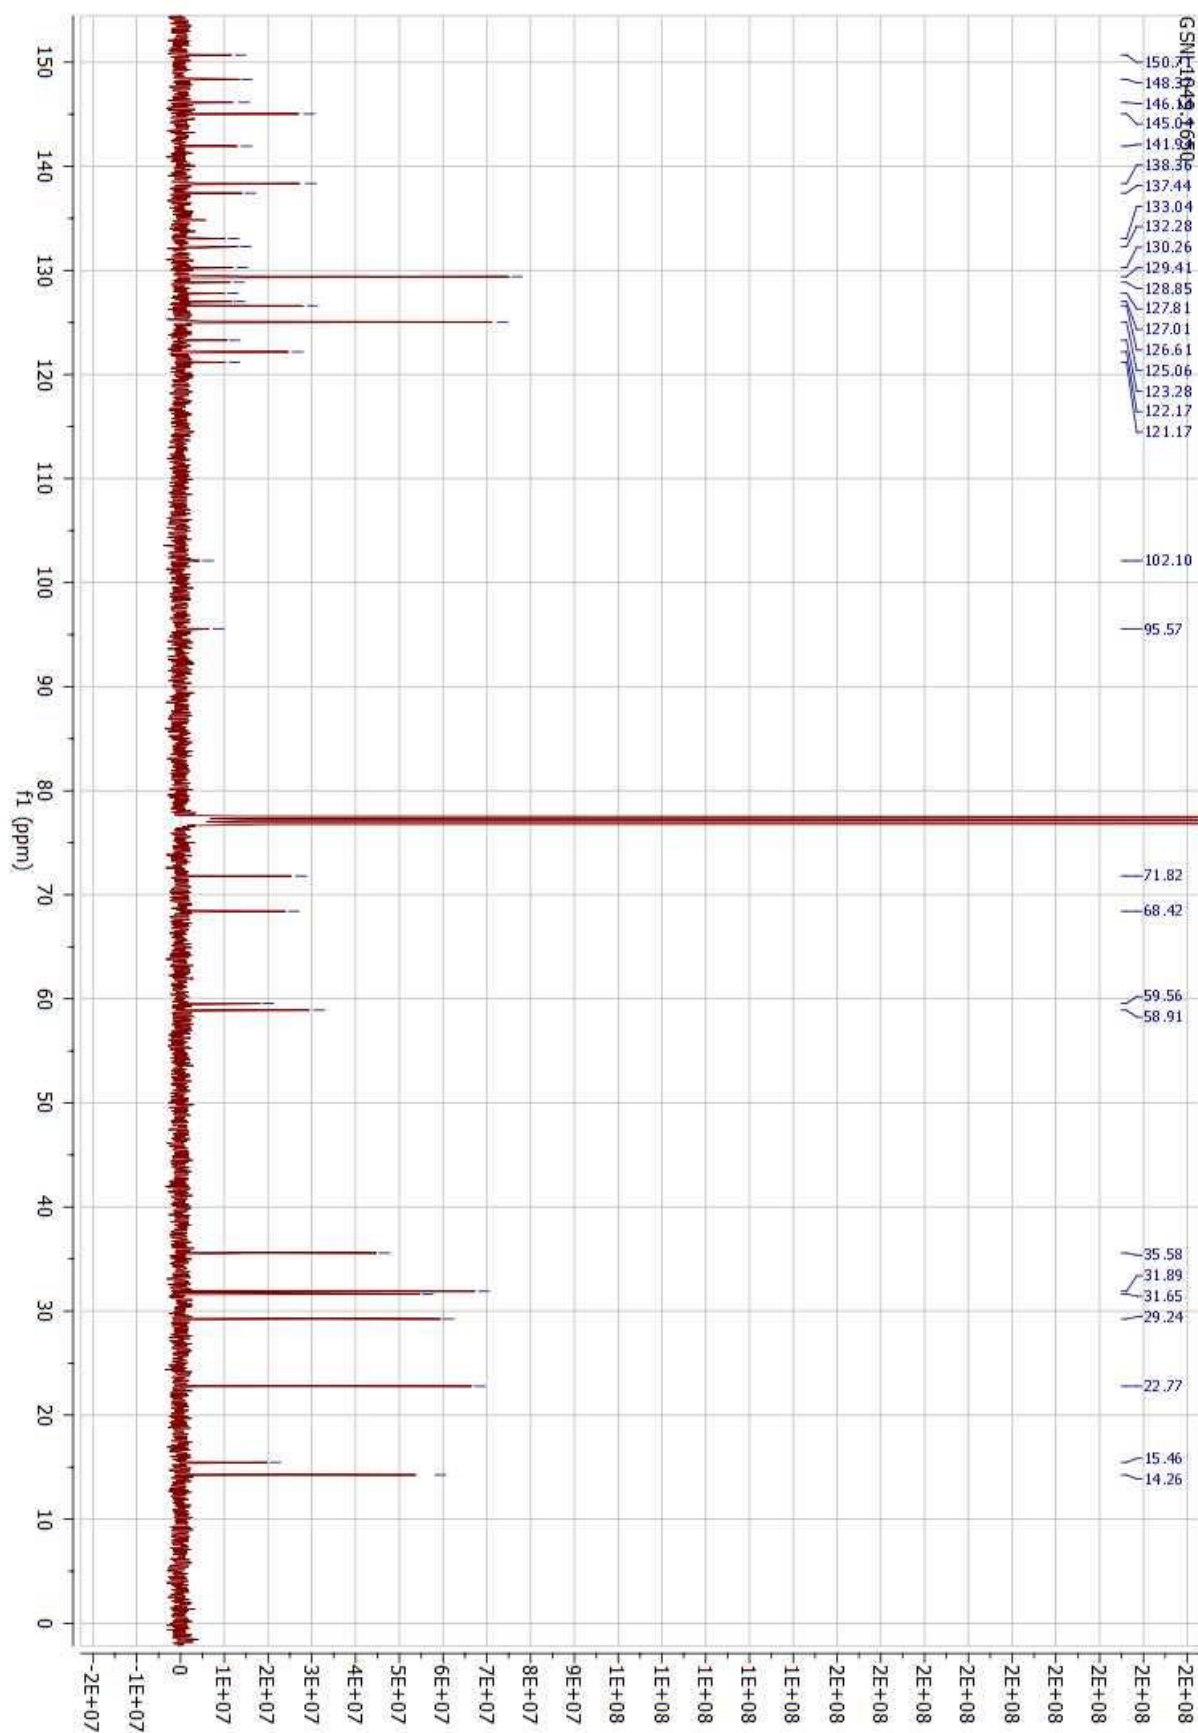

Figure S15:  $^1\text{H}$ -NMR of compound 8 ( $\text{CD}_2\text{Cl}_2$ , 400 MHz, 298 K)

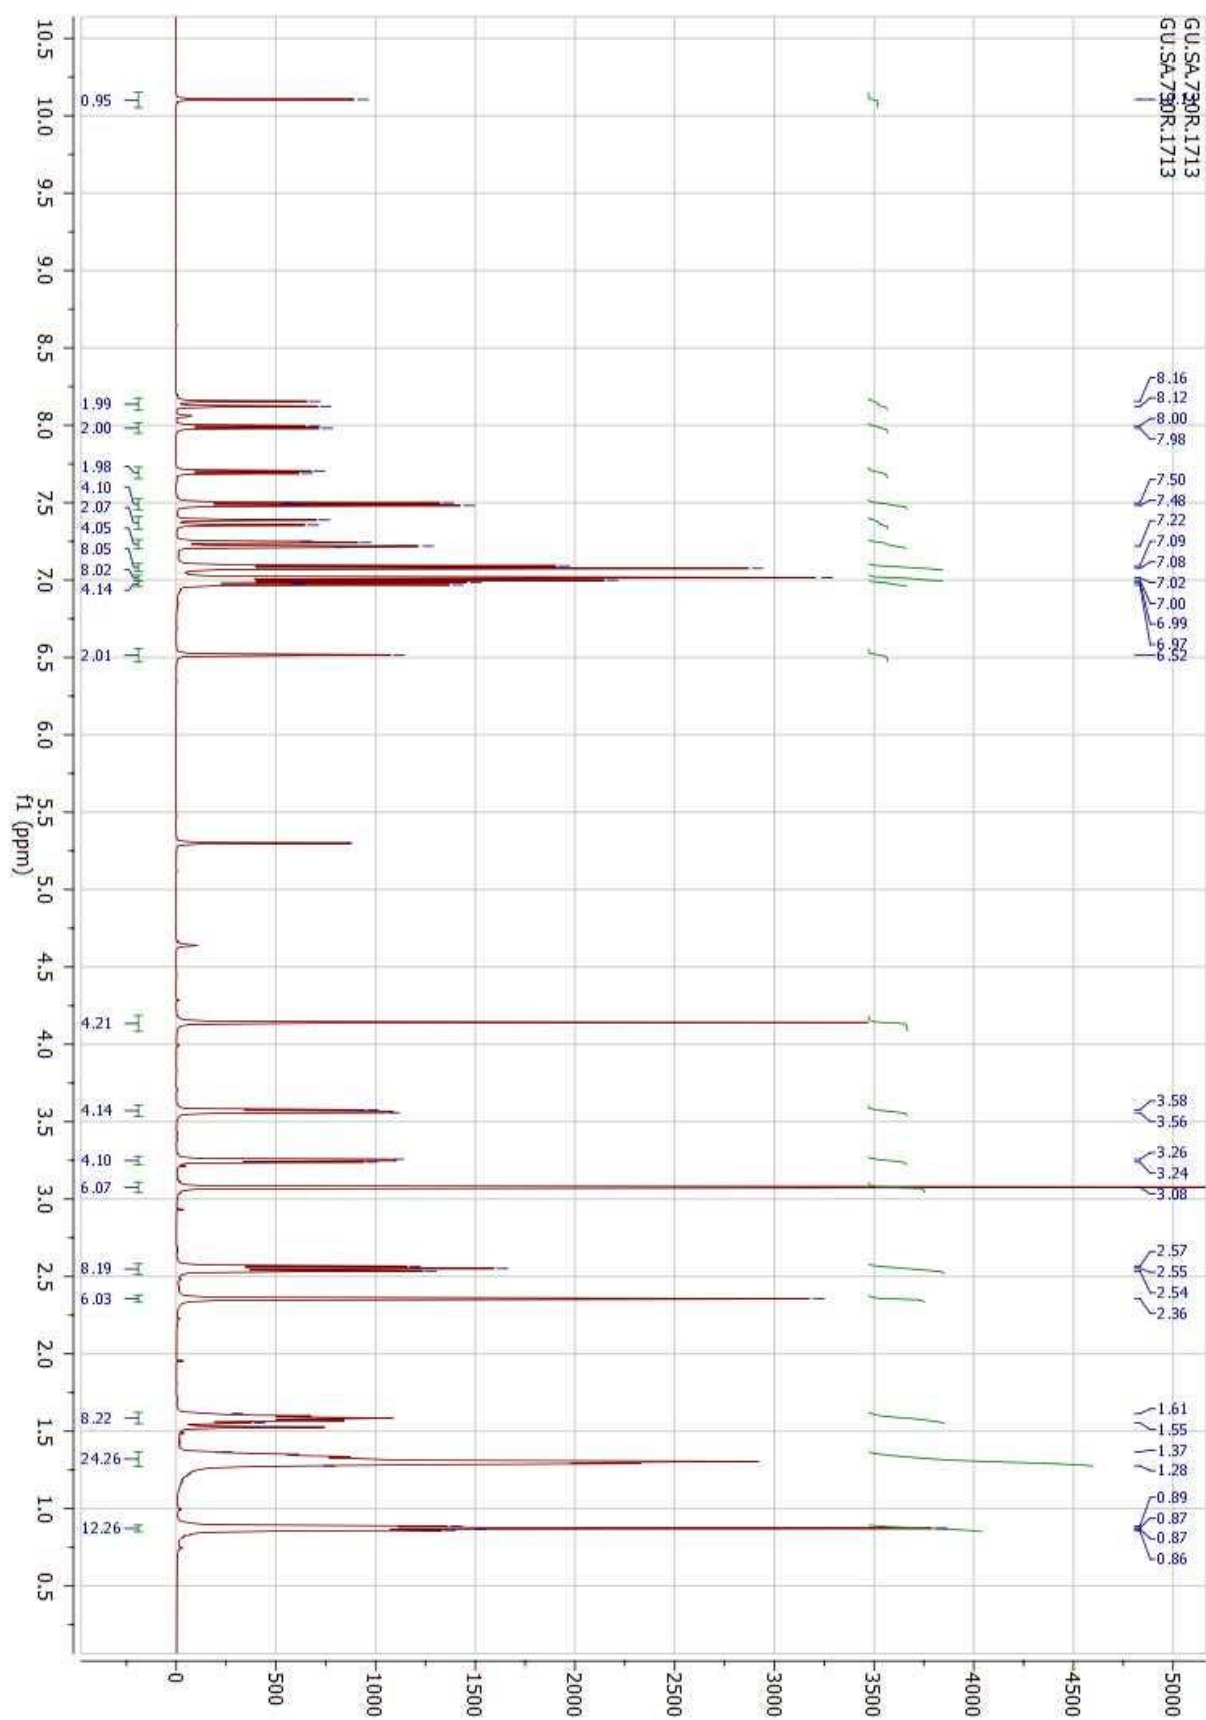

Figure S16:  $^{13}\text{C}$ -NMR of compound 8 ( $\text{CDCl}_3$ , 100 MHz, 298 K)

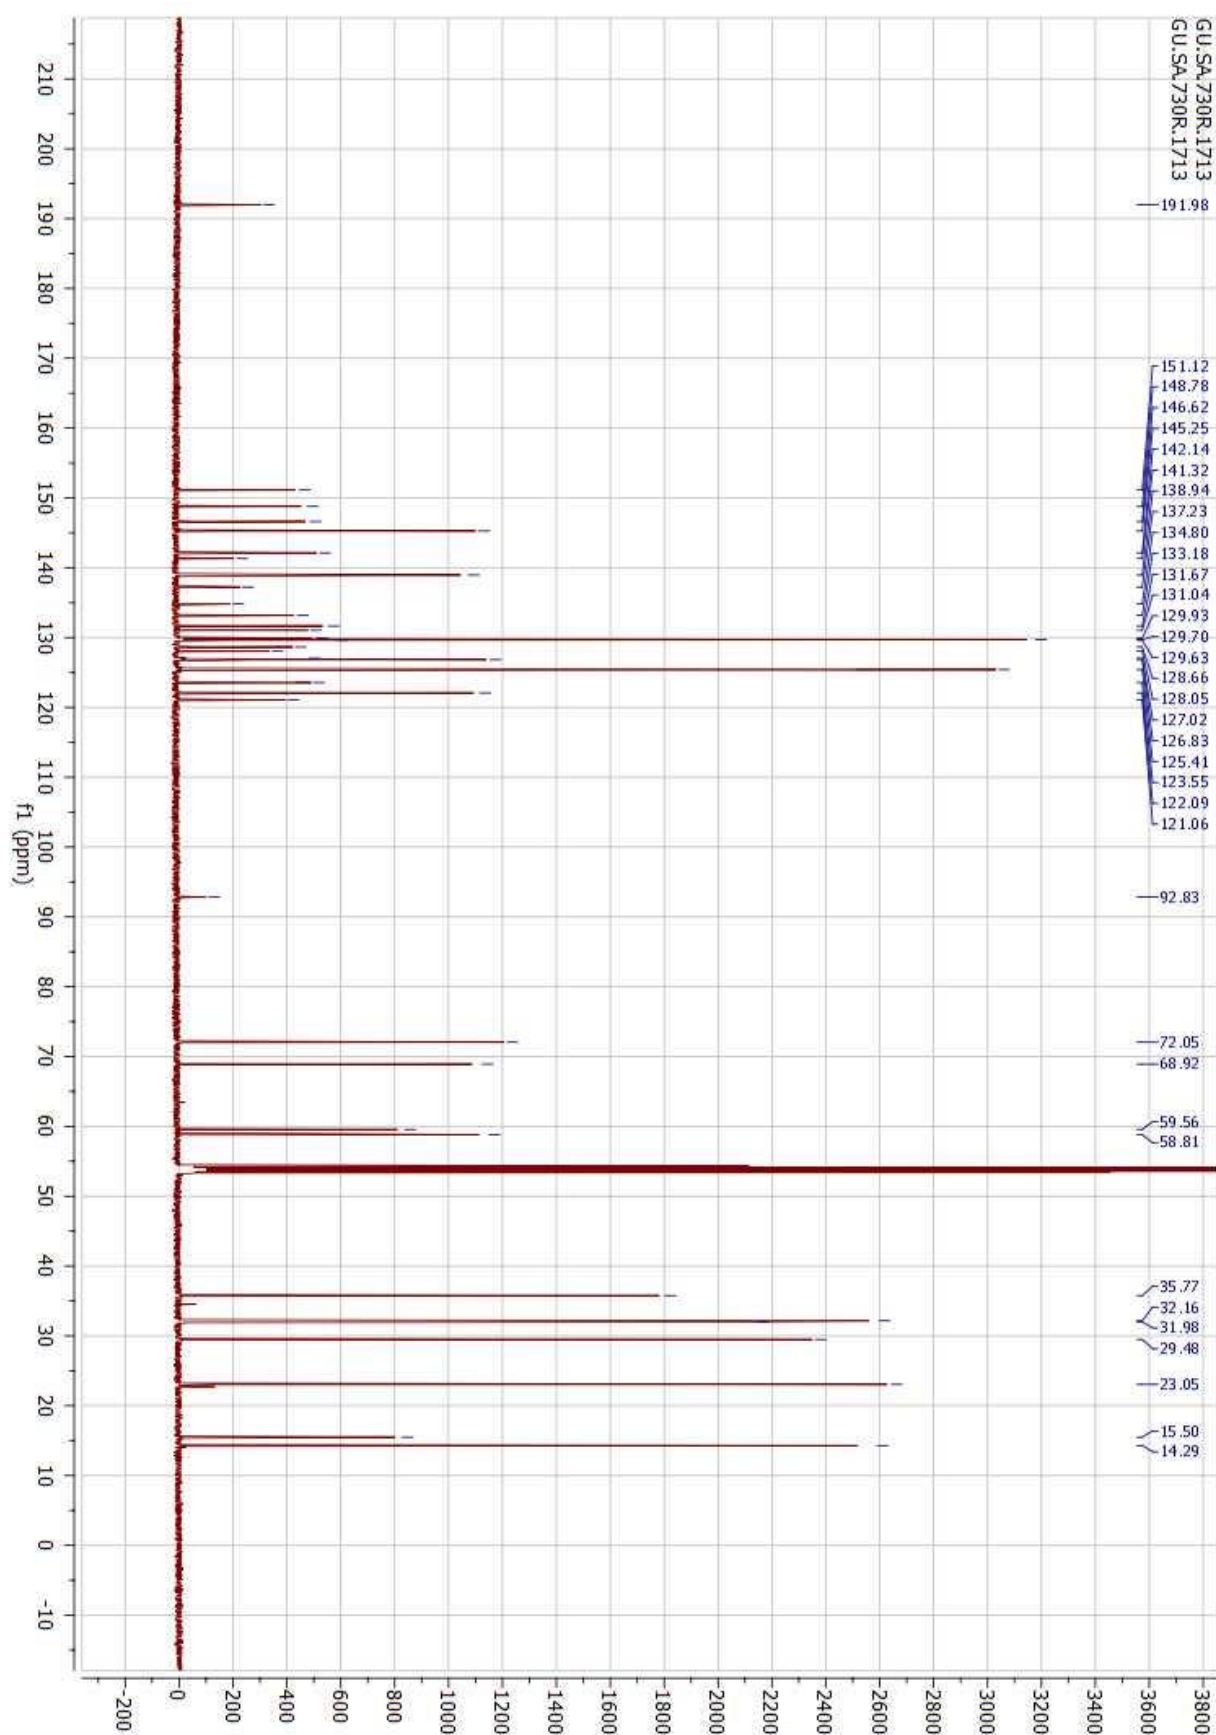

Figure S17:  $^1\text{H}$ -NMR of compound BOD-TTPA-alk ( $\text{CDCl}_3$ , 400 MHz, 298 K)

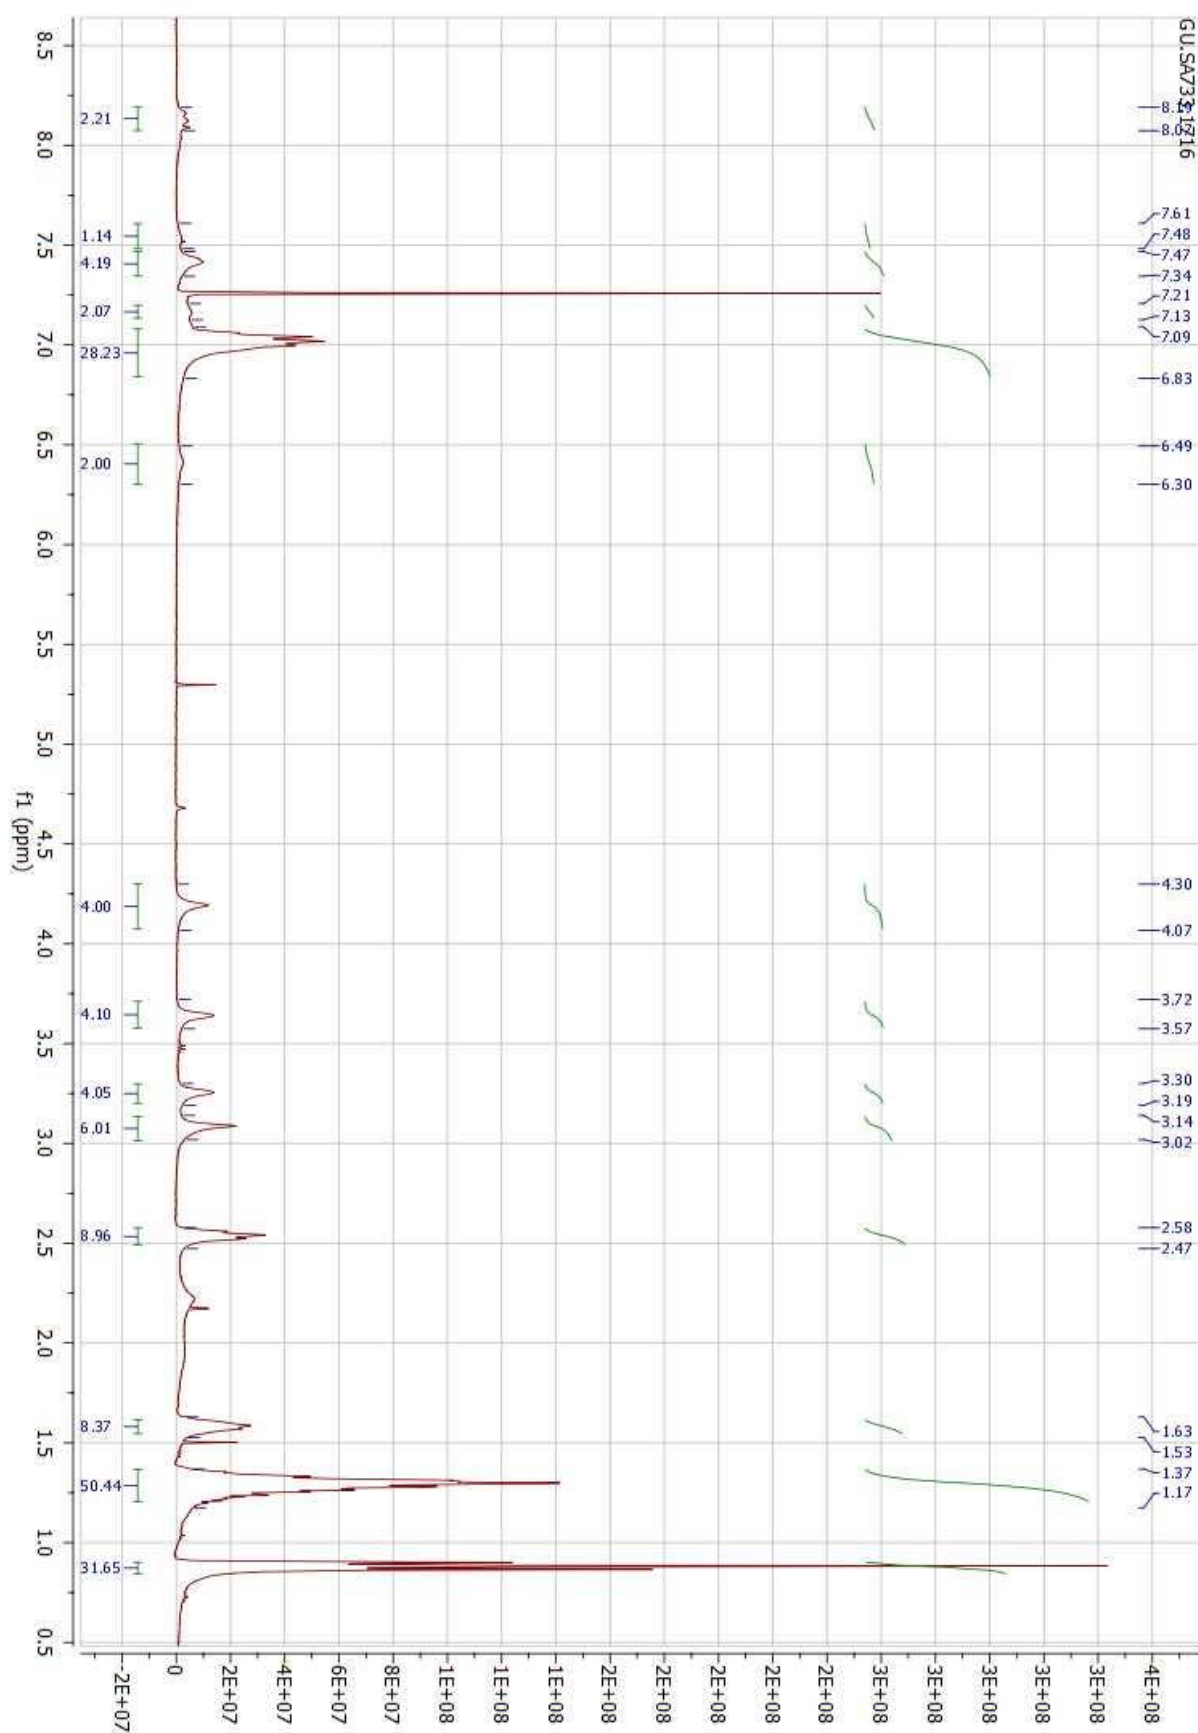

Figure S18:  $^1\text{H}$ -NMR of compound 9 ( $\text{CD}_2\text{Cl}_2$ , 400 MHz, 298 K)

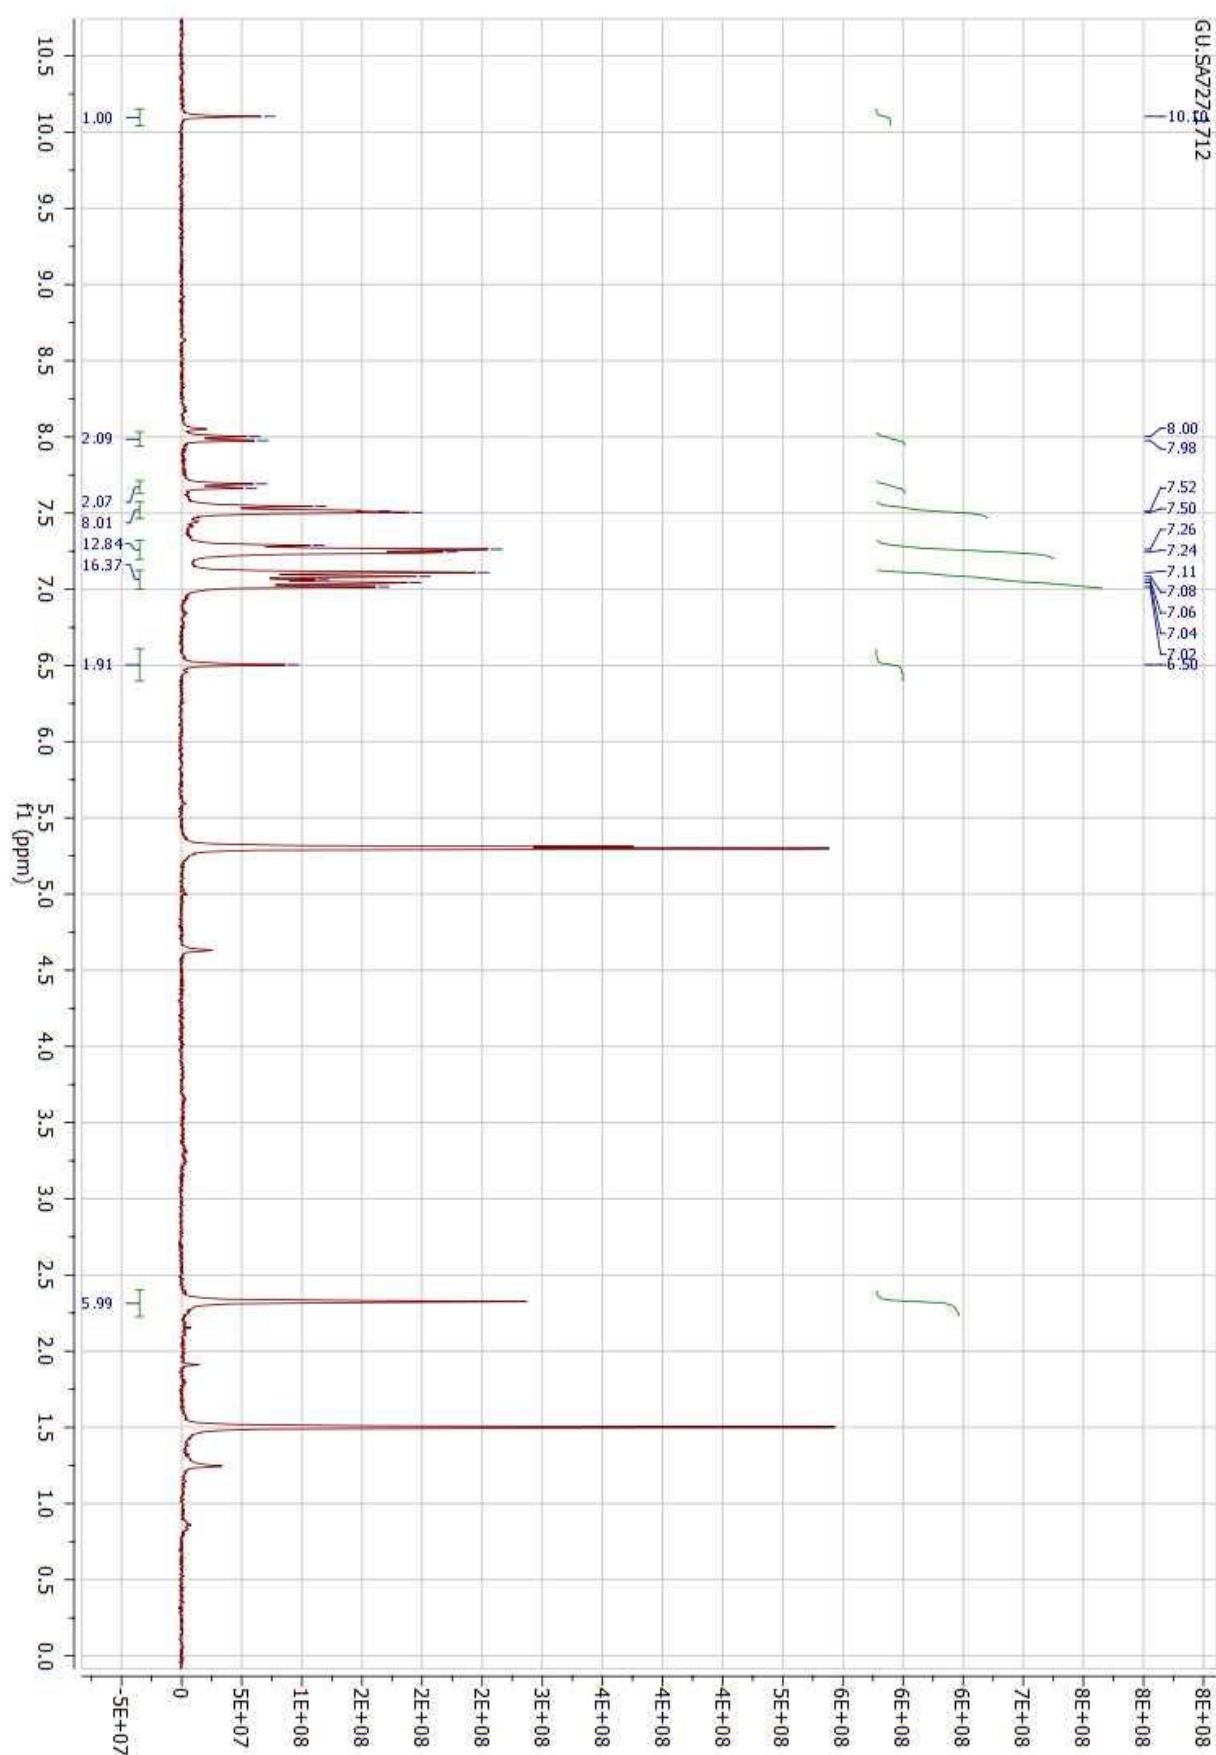

Figure S19:  $^{13}\text{C}$ -NMR of compound 9 ( $\text{CDCl}_3$ , 100 MHz, 298 K)

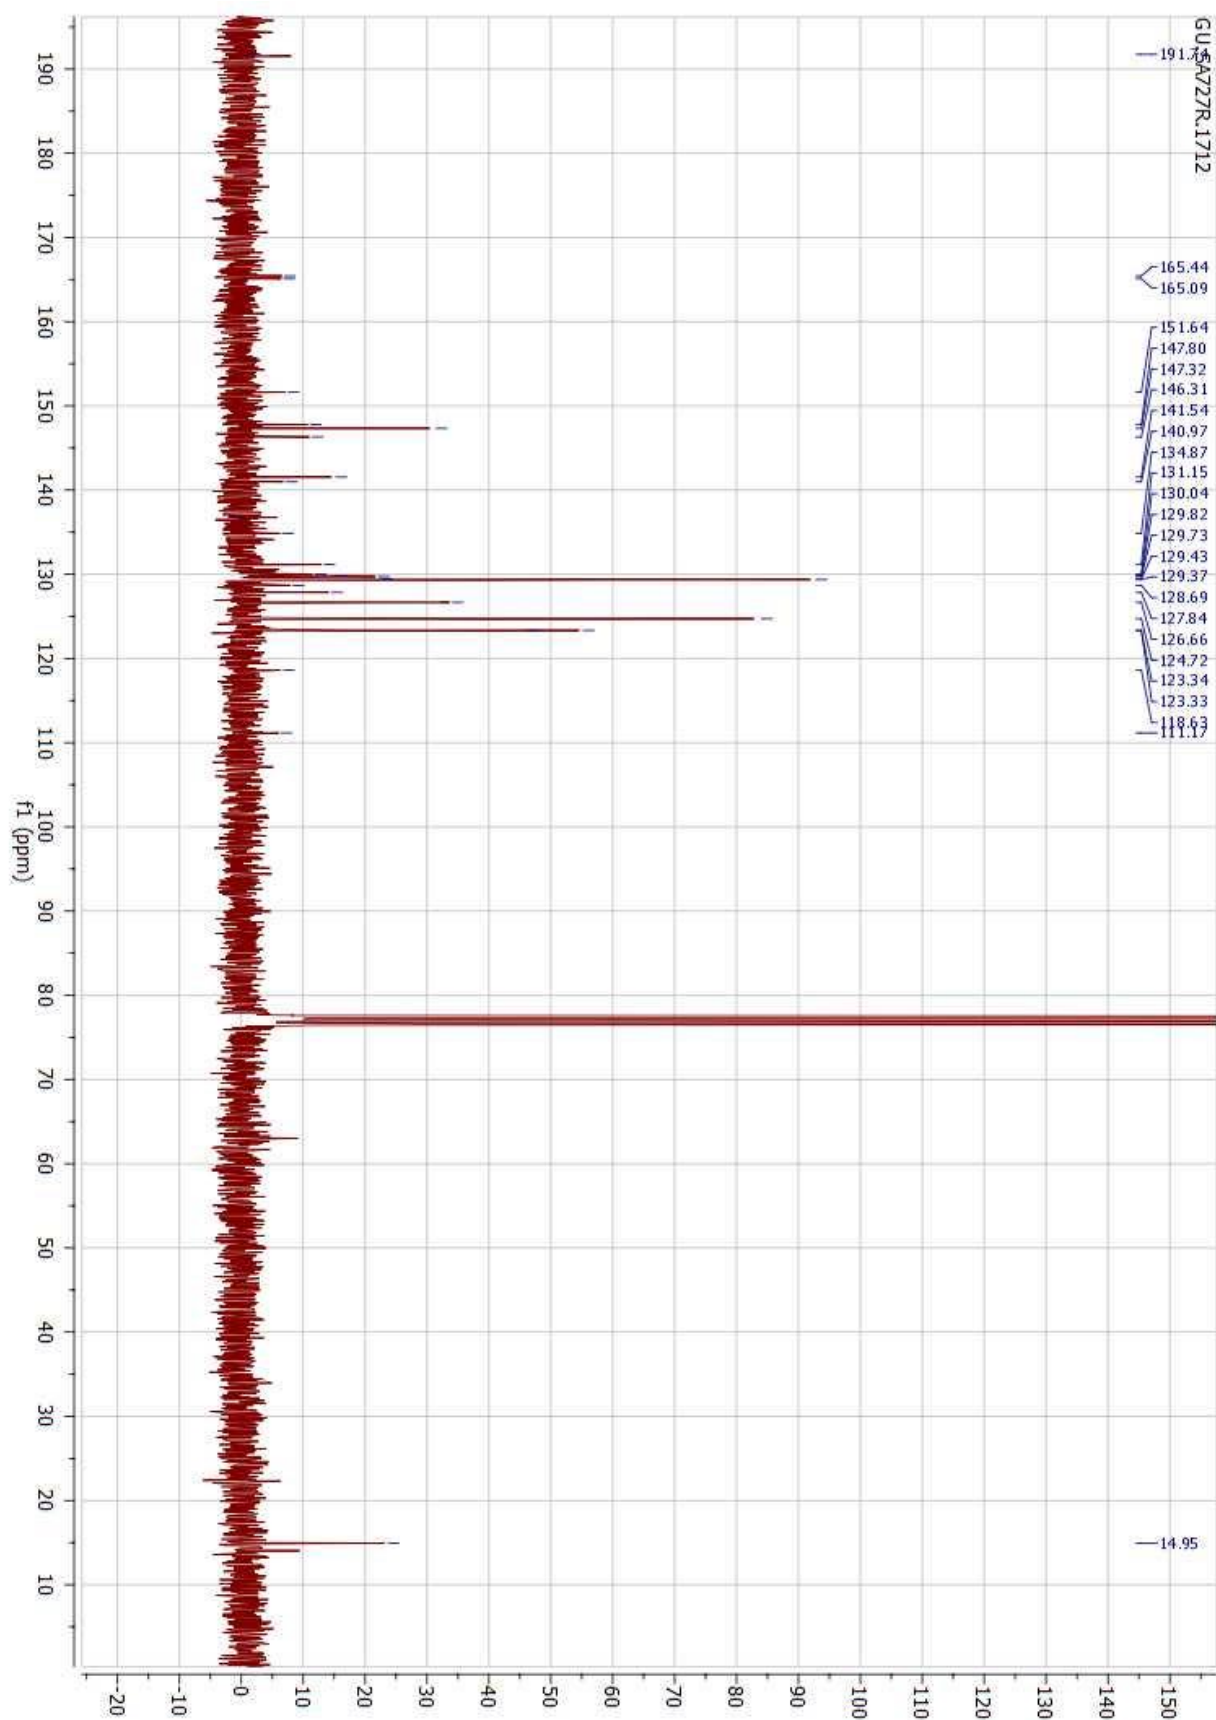



Figure S20:  $^1\text{H}$ -NMR of compound BOD-TTPA ( $\text{CDCl}_3$ , 400 MHz, 298 K)

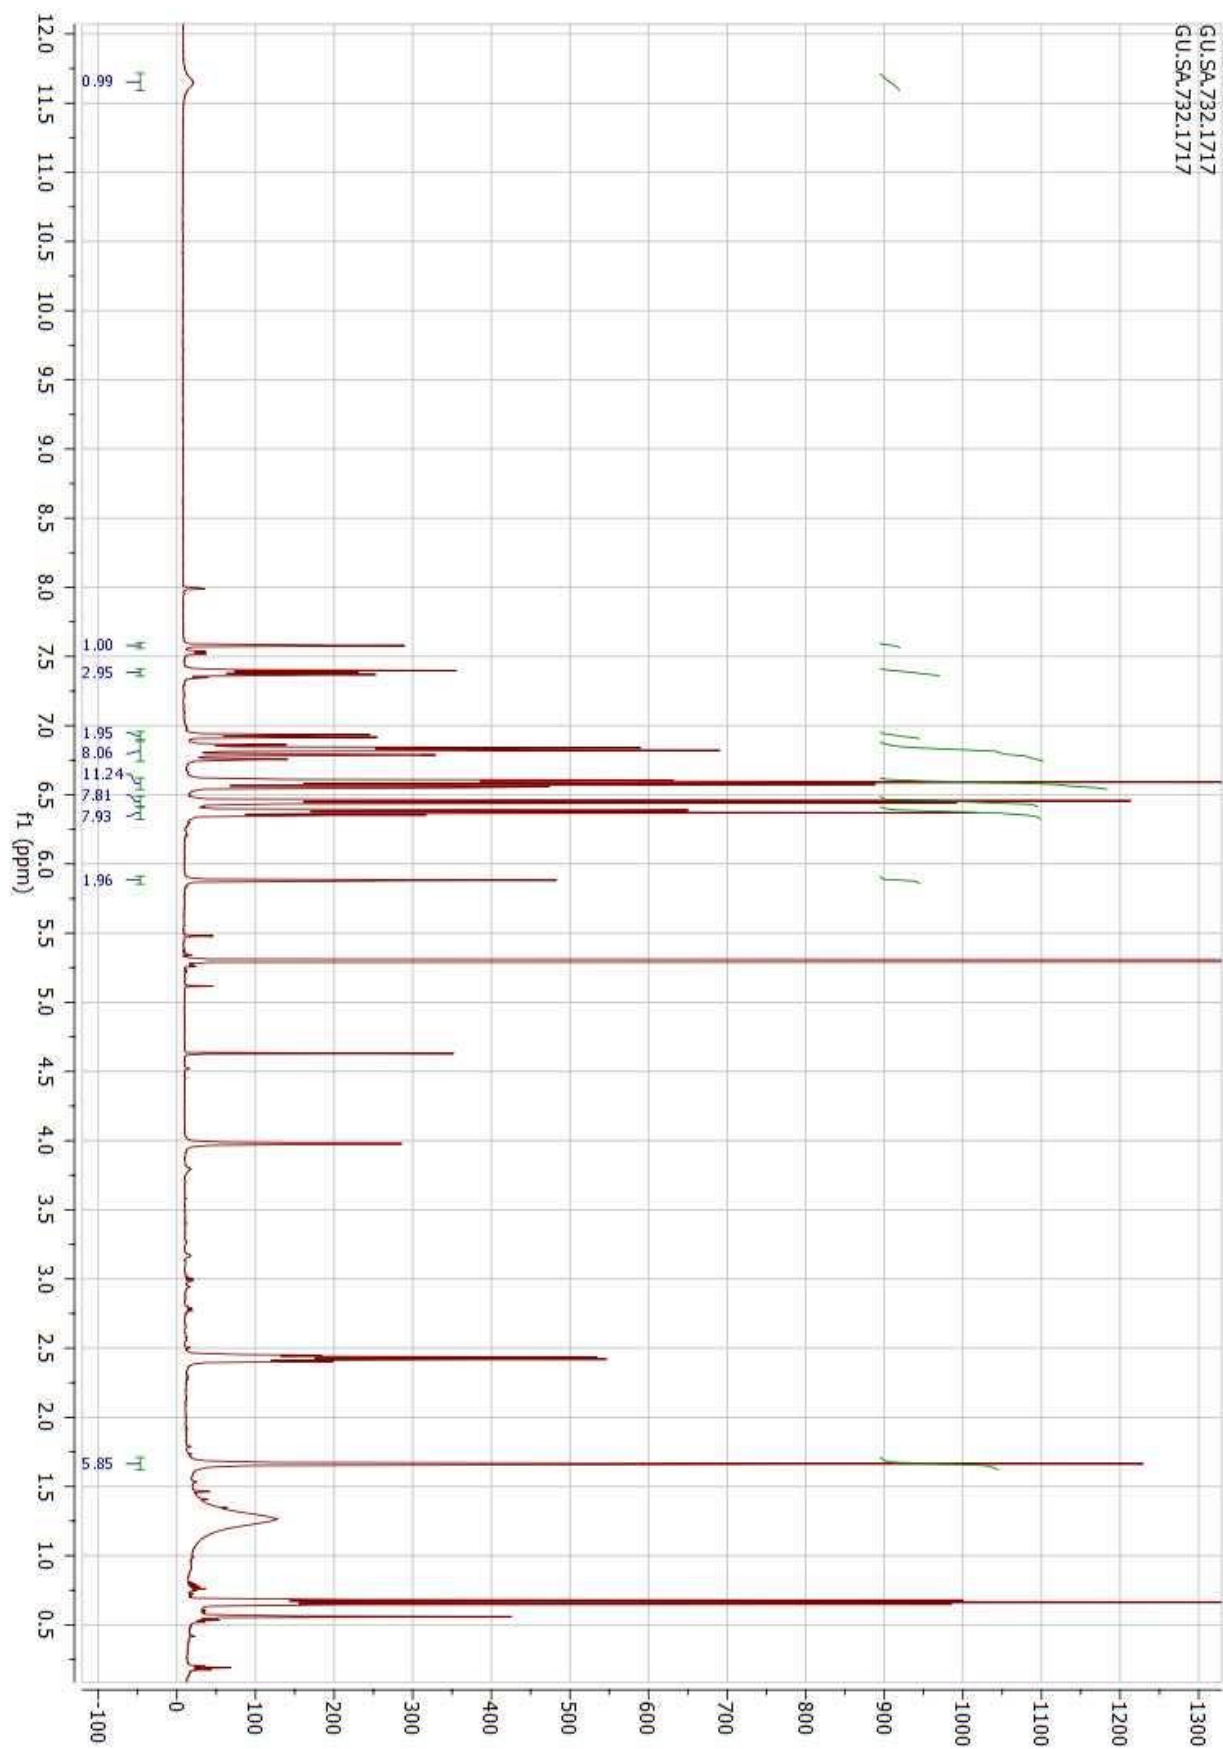

Figure S21:  $^{13}\text{C}$ -NMR of BOD-TTPA ( $\text{CDCl}_3$ , 100 MHz, 298 K)

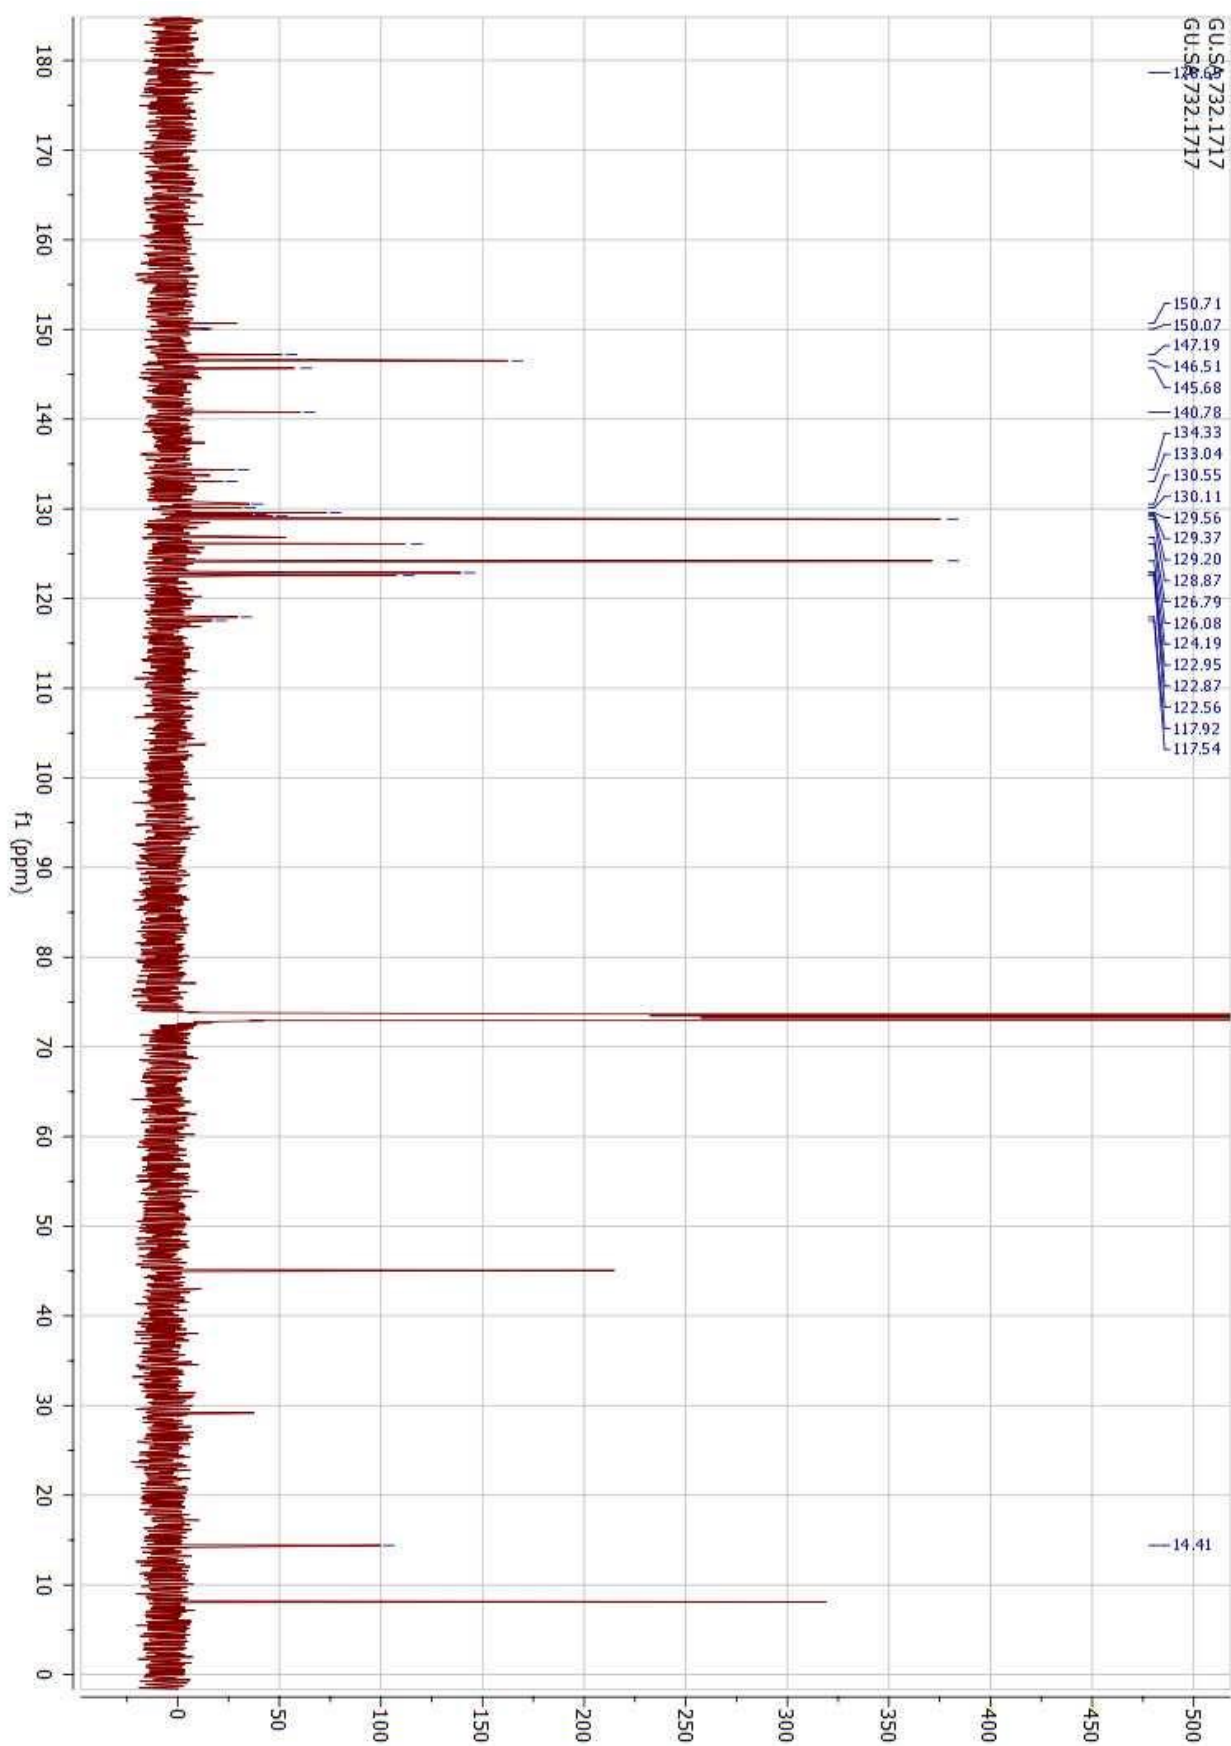



**Figure S22: HRMS spectra of compound BOD-TTPA**

Service de spectrometrie de masse - Institut de Chimie - Strasbourg - UMR 7177 CNRS / UDS

**Analysis Info**

Analysis Name F00675SK.d  
Method Tune\_pos\_Mid.m  
Sample Name AS732

Acquisition Date 6/12/2017 2:49:20 PM  
Operator BDAL@DE  
Instrument micrOTOF II

**Acquisition Parameter**

Source Type ESI Ion Polarity Positive Capillary Dry Heater 4500 V 200 °C Nebulizer Dry Gas 0.3 Bar 3.0 l/min Set Hexapole RF 330.0 Vpp Set Capillary Exit 150.0 V

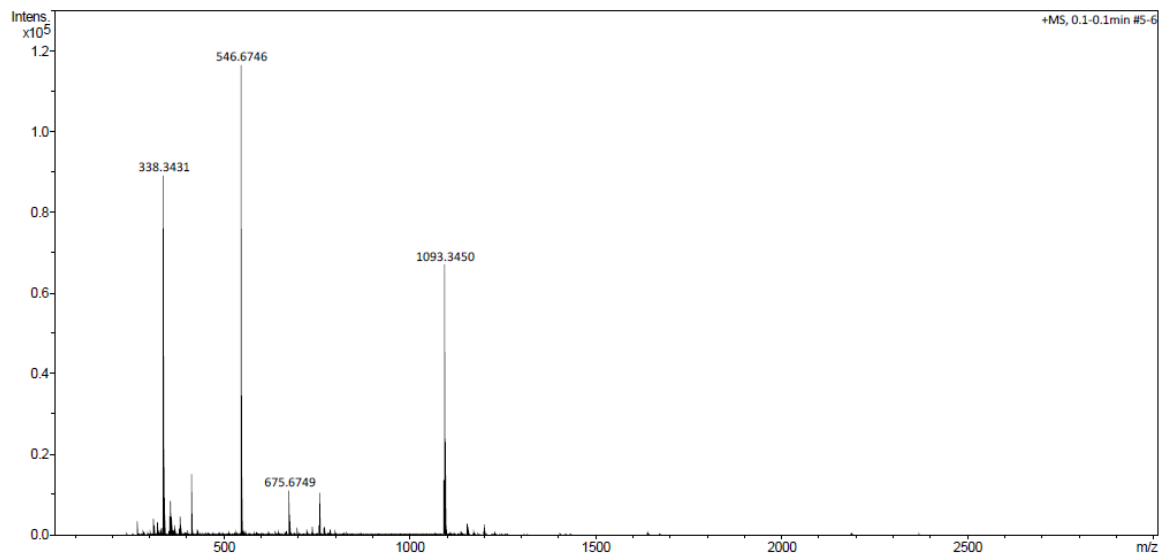

**Mass Spectrum HR Report**

**Analysis Info**

Analysis Name D:\Data\SMasse\2017\Juin 2017\F00675SK.d  
Method Tune\_pos\_Mid.m  
Sample Name AS732  
Comment

Acquisition Date 6/12/2017 2:49:20 PM

Operator BDAL@DE  
Instrument micrOTOF II 8213750.1045  
1

**Acquisition Parameter**

Source Type ESI Ion Polarity Positive Scan Begin 50 m/z Scan End 3000 m/z Set Corrector Fill 59.0 V n/a Set Reflector 1800.0 V Set Flight Tube 8600.0 V Set Detector TOF 1953.3 V

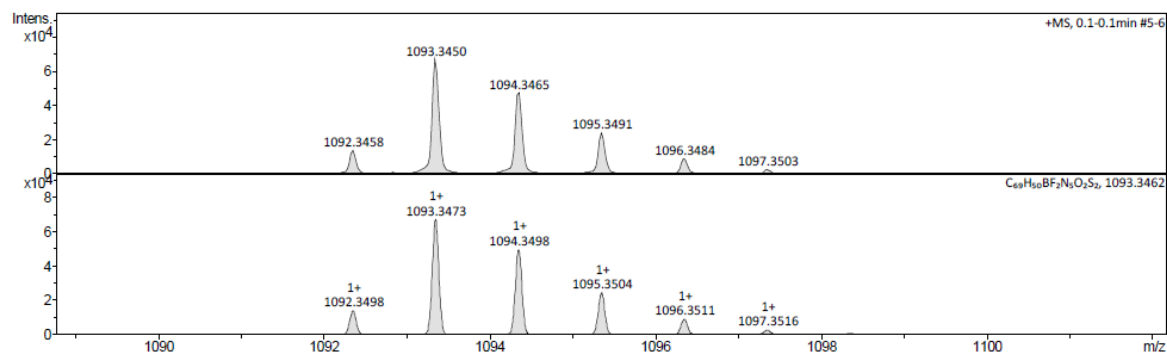

| Meas. m/z # Ion Formula       | m/z err [ppm]       | Mean err rdb N-Rule e <sup>-</sup> Conf mSigma | Std I       | Std Mean m/z | Std I Std m/z Diff | Std Comb Dev |
|-------------------------------|---------------------|------------------------------------------------|-------------|--------------|--------------------|--------------|
| 546.674644 1 C69H50BF2N5O2S2  | 546.672804 -2.4     | -3.1 47.0 ok even                              | 5.8 5.0     | n.a.         | n.a.               | n.a.         |
| 2 C69H46BF2N5O2S2             | 544.657154 -3703.1  | -2036.5 49.0 ok even                           | 603.1 339.2 | n.a.         | n.a.               | n.a.         |
| 3 C69H48BF2N5O2S2             | 545.664979 -13.8    | 505.6 48.0 ok even                             | 603.9 620.1 | n.a.         | n.a.               | n.a.         |
| 1093.344958 1 C69H49BF2N5O2S2 | 1092.338331 -2.7    | -3.8 47.5 ok even                              | 391.0 391.9 | n.a.         | n.a.               | n.a.         |
| 2 C69H51BF2N5O2S2             | 1094.353981 923.0   | 1995.6 46.5 ok even                            | 602.9 339.0 | n.a.         | n.a.               | n.a.         |
| 3 C69H47BF2N5O2S2             | 1090.322681 -2770.9 | -1224.0 48.5 ok even                           | 603.1 339.1 | n.a.         | n.a.               | n.a.         |
| 1 C69H50BF2N5O2S2             | 1093.346156 2.1     | 2.3 47.0 ok odd                                | 14.8 11.6   | n.a.         | n.a.               | n.a.         |

**Figure S23: HRMS spectra of compound BOD-TTPA-alk**

|                      |                |                         |                       |
|----------------------|----------------|-------------------------|-----------------------|
| <b>Analysis Info</b> |                | <b>Acquisition Date</b> |                       |
| Analysis Name        | F00680SK.d     | Acquisition Date        | 6/13/2017 10:39:32 AM |
| Method               | Tune_pos_Mid.m | Operator                | BDAL@DE               |
| Sample Name          | AS733          | Instrument              | micrOTOF II           |

|                              |          |            |        |           |           |                    |           |
|------------------------------|----------|------------|--------|-----------|-----------|--------------------|-----------|
| <b>Acquisition Parameter</b> |          | Capillary  | 4500 V | Nebulizer | 0.3 Bar   | Set Hexapole RF    | 330.0 Vpp |
| Source Type                  | ESI      | Dry Heater | 200 °C | Dry Gas   | 3.0 l/min | Set Capillary Exit | 150.0 V   |
| Ion Polarity                 | Positive |            |        |           |           |                    |           |

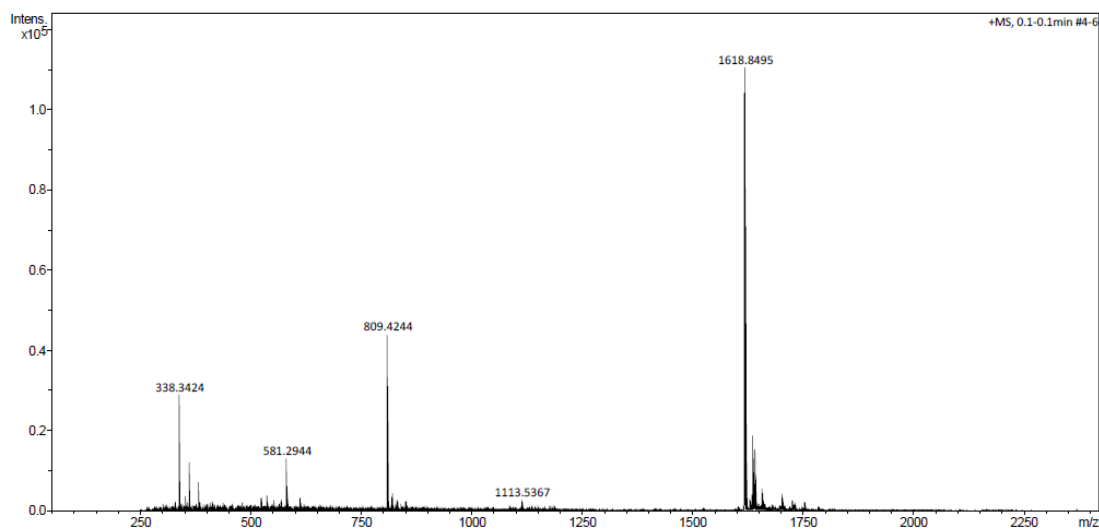

### Mass Spectrum HR Report

|                      |                                          |                         |                       |
|----------------------|------------------------------------------|-------------------------|-----------------------|
| <b>Analysis Info</b> |                                          | <b>Acquisition Date</b> |                       |
| Analysis Name        | D:\Data\SMasse\2017\Juin 2017\F00680SK.d | Acquisition Date        | 6/13/2017 10:39:32 AM |
| Method               | Tune_pos_Mid.m                           | Operator                | BDAL@DE               |
| Sample Name          | AS733                                    | Instrument              | micrOTOF II           |
| Comment              |                                          |                         | 8213750.1045          |

|                              |          |              |          |                    |          |
|------------------------------|----------|--------------|----------|--------------------|----------|
| <b>Acquisition Parameter</b> |          | Ion Polarity | Positive | Set Corrector Fill | 59.0 V   |
| Source Type                  | ESI      | n/a          | n/a      | n/a                | n/a      |
| Scan Begin                   | 50 m/z   | n/a          | n/a      | Set Reflector      | 1800.0 V |
| Scan End                     | 3000 m/z | n/a          | n/a      | Set Flight Tube    | 9600.0 V |
|                              |          |              |          | Set Detector TOF   | 1953.3 V |

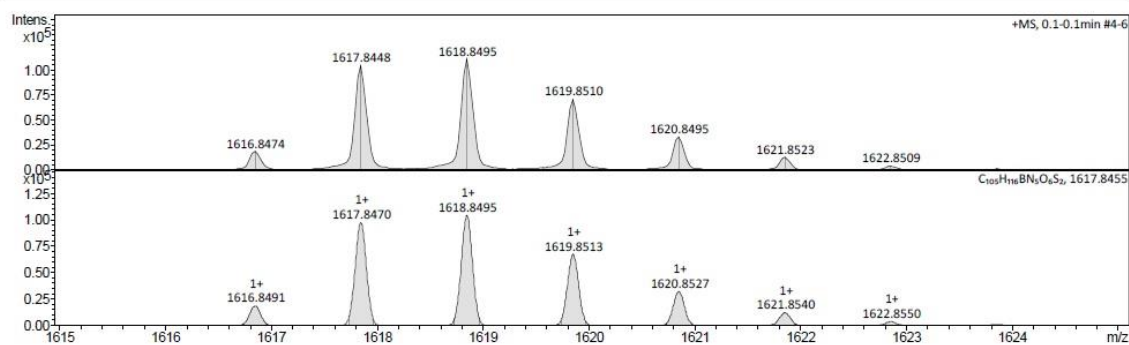

| Meas. m/z # Ion Formula       | m/z err [ppm] | Mean err [ppm] | rdB     | N-Rule | e <sup>-</sup> | Conf | mSigma | Std I | Std Mean | Std I | Std m/z | Diff | Std Comb | Dev  |
|-------------------------------|---------------|----------------|---------|--------|----------------|------|--------|-------|----------|-------|---------|------|----------|------|
| 1615.824444 1 C105H114BN5O6S2 | 1615.829810   | 1.5            | -621.3  | 52.0   | ok odd         |      | 578.5  | 293.1 | n.a.     | n.a.  | n.a.    | n.a. | n.a.     | n.a. |
| 1 1 C105H114BN5O6S2           | 1615.829810   | 1.5            | -621.3  | 52.0   | ok odd         |      | 578.5  | 293.1 | n.a.     | n.a.  | n.a.    | n.a. | n.a.     | n.a. |
| 1616.847375 1 C105H113BN5O6S2 | 1614.821985   | 1.5            | -1183.1 | 52.5   | ok even        |      | 578.5  | 293.1 | n.a.     | n.a.  | n.a.    | n.a. | n.a.     | n.a. |
| 2 1 C105H111BN5O6S2           | 1612.806335   | 1.5            | -2308.7 | 53.5   | ok even        |      | 578.5  | 293.2 | n.a.     | n.a.  | n.a.    | n.a. | n.a.     | n.a. |
| 3 1 C105H109BN5O6S2           | 1610.790685   | 1.5            | -3437.1 | 54.5   | ok even        |      | 578.5  | 293.2 | n.a.     | n.a.  | n.a.    | n.a. | n.a.     | n.a. |
| 1617.844793 1 C105H115BN5O6S2 | 1616.837635   | -1.9           | -3.0    | 51.5   | ok even        |      | 358.0  | 296.2 | n.a.     | n.a.  | n.a.    | n.a. | n.a.     | n.a. |
| 2 1 C105H117BN5O6S2           | 1618.853285   | 1.5            | 1059.8  | 50.5   | ok even        |      | 578.4  | 293.1 | n.a.     | n.a.  | n.a.    | n.a. | n.a.     | n.a. |

## Cyclic voltammetry measurements

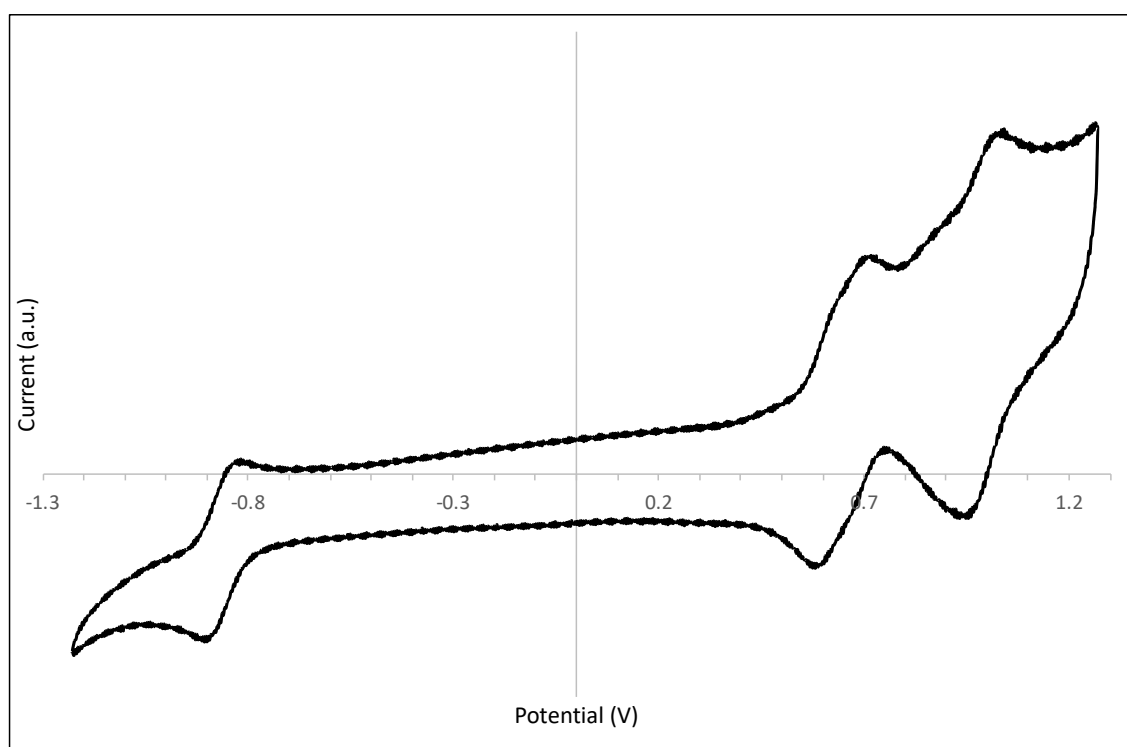

**Figure S24:** CV measurement of the BOD-TTPA-alk. Scan speed: 100 mV/s, scan direction: from 0 V to 1.2 V to -1.3 V.

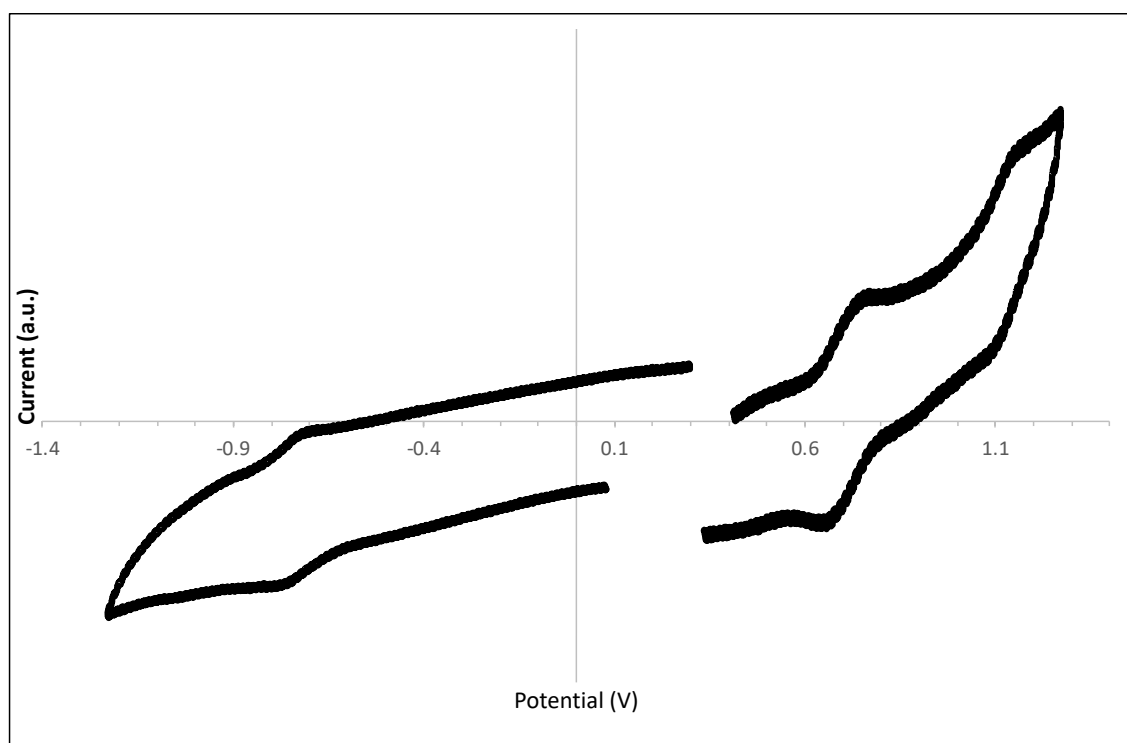

**Figure S25:** CV measurement of the BOD-TTPA. Scan speed: 100 mV/s. scan direction: from 0 V to 1.2 V to -1.2 V.

## Devices electrical parameters

Table S1: Devices electrical parameters as a function of tBP content in the electrolyte (0.5M of BMII, 0.03M of I2 0.5M of LiI, 0.1M of guanidinium thiocyanate in a mixture of acetonitrile and 3-methoxypropionitrile (85:15, v/v))

| Dye                 | [ <sup>t</sup> BP] (mol/L) | $J_{sc}$ (mA·cm <sup>-2</sup> ) | $V_{oc}$ (V) | FF   | PCE (%) |
|---------------------|----------------------------|---------------------------------|--------------|------|---------|
| <b>BOD-TTPA-alk</b> | 0                          | 4.70                            | 0.37         | 0.65 | 1.12    |
|                     | 0.1                        | 1.48                            | 0.38         | 0.61 | 0.27    |
|                     | 0.5                        | 0.41                            | 0.42         | 0.61 | 0.10    |
| <b>BOD-TTPA</b>     | 0                          | 7.33                            | 0.33         | 0.51 | 1.22    |
|                     | 0.1                        | 2.70                            | 0.39         | 0.66 | 0.69    |
|                     | 0.5                        | 0.88                            | 0.46         | 0.67 | 0.27    |

## References

- [1]. A. P. Kulkarni; C. J. Tonzola; A. Babel; S. A. Jenekhe; *Chem. Mater.* **2004**, 16, 23, 4556-4573
- [2]. T. Marinado, D. P. Hagberg, M. Hedlund, T. Edvinsson, E. M. J. Johansson, G. Boschloo, H. Rensmo, T. Brinck, L. Sun and A. Hagfeldt; *PhysChemChemPhys*, **2009**, 133-141.
- [3]. A. Poirel; A. De Nicola; P. Retailleau; R. Ziessel; *The Journal of Organic Chemistry*, **2012**, 77, 17, 7512-7525.
